# Supplementary material
Source: PubMed Central journal article supplement (PMC6643732)
Supplement: 2016.162594.BITTOLO_SUPPL.pdf [file 2016.162594.BITTOLO_SUPPL.pdf]

**Mutations in the 3' untranslated region of *NOTCH1* are associated with low CD20 expression levels in chronic lymphocytic leukemia**

Tamara Bittolo,<sup>1\*</sup> Federico Pozzo,<sup>1\*</sup> Riccardo Bomben,<sup>1</sup> Tiziana D'Agaro,<sup>1</sup> Vanessa Bravin,<sup>1</sup> Pietro Bulian,<sup>1</sup> Francesca Maria Rossi,<sup>1</sup> Antonella Zucchetto,<sup>1</sup> Massimo Degan,<sup>1</sup> Paolo Macor,<sup>2</sup> Giovanni D'Arena,<sup>3</sup> Annalisa Chiarenza,<sup>4</sup> Francesco Zaja,<sup>5</sup> Gabriele Pozzato,<sup>6</sup> Francesco Di Raimondo,<sup>4</sup> Davide Rossi,<sup>7</sup> Gianluca Gaidano,<sup>8</sup> Giovanni Del Poeta,<sup>9</sup> Valter Gattei<sup>1,†</sup> and Michele Dal Bo<sup>1,†</sup>

<sup>1</sup>Clinical and Experimental Onco-Hematology Unit, Centro di Riferimento Oncologico, I.R.C.C.S., Aviano (PN), Italy; <sup>2</sup>Department of Life Sciences, University of Trieste, Italy; <sup>3</sup>Onco-Hematology Department, Centro di Riferimento Oncologico della Basilicata, I.R.C.C.S., Rionero in Vulture, Italy; <sup>4</sup>Division of Hematology, Ferrarotto Hospital, Catania, Italy; <sup>5</sup>Clinica Ematologica, Centro Trapianti e Terapie Cellulari "Carlo Melzi" DISM, Azienda Ospedaliera Universitaria S. Maria Misericordia, Udine, Italy; <sup>6</sup>Department of Internal Medicine and Hematology, Maggiore General Hospital, University of Trieste, Italy; <sup>7</sup>Hematology, Institute of Oncology Research and Oncology Institute of Southern Switzerland, Bellinzona, Switzerland; <sup>8</sup>Division of Hematology—Department of Translational Medicine—University of Eastern Piedmont, Novara, Italy and <sup>9</sup>Division of Hematology, S. Eugenio Hospital and University of Tor Vergata, Rome, Italy; \*TB and FP contributed equally as first authors; †VG and MDB contributed equally as senior authors.

Correspondence: [mdalbo@cro.it](mailto:mdalbo@cro.it); [vgattei@cro.it](mailto:vgattei@cro.it)  
doi:10.3324/haematol.2016.162594

**Mutations in the 3' untranslated region (3' UTR) of *NOTCH1* are associated with low CD20 expression levels in chronic lymphocytic leukemia.**

**Supplemental Information:**

- **Supplemental Materials and Methods**
- **Supplemental Tables**
  - Table S1. Primers for targeted ultra-deep NGS.
  - Table S2. Primers for ARMS-PCR.
  - Table S3. Primers for Sanger sequencing of the *NOTCH1* gene.
  - Table S4. Primers for detection of *NOTCH1* aberrant splicing in cases with mutations in the 3' UTR.
  - Table S5. Antibodies for western blotting and flow cytometry.
  - Table S6. Biological characterization of the CLL cohort (662 cases).
  - Table S7. *NOTCH1* mutation features of the *NOTCH1* mutated cohort (116 cases).
- **Supplemental Figure Legends**
- **Supplemental Figures**
  - Figure S1. Validation of NGS strategy to detect *NOTCH1* mutations.
  - Figure S2. Western blot of NOTCH1 and CD20 protein expression according to *NOTCH1* mutational status.
  - Figure S3. CD20 expression by flow cytometry in CLL cases.

## Supplemental Materials and Methods

### CLL cases

Primary neoplastic cells of the 662 CLL cases entering the study were separated by Ficoll-Hypaque (Pharmacia, Uppsala, Sweden) density gradient centrifugation, and used either directly or cryopreserved until use, as reported.<sup>1</sup>

### Next generation sequencing (NGS)

*NOTCH1* mutational status was investigated by NGS with an amplicon based strategy. Specific primers for *NOTCH1* exon 34 and part of 3' untranslated region (3' UTR), carrying new mutation sites described by Puente *et al.*,<sup>2</sup> were designed with the ION Ampliseq designer (Thermo Scientific, Milan, Italy, <https://www.ampliseq.com/>), checked using the Primer3 program,<sup>3,4</sup> and modified according to Illumina (San Diego, CA) protocol adding specific adapter sequences (Table S1). Amplicon libraries were generated using a modified Illumina protocol. Briefly, multiplex PCR products were generated using Phusion High-Fidelity DNA Polymerase (Thermo Scientific, Milan, Italy) and subsequently tagged with specific index according to modified procedures for NexteraXT (DNALibrary Preparation kit, Illumina). Purified libraries were pooled, and paired-end sequenced in a MiSeq instrument (Illumina). The average sequencing coverage was >6000X. Across the whole target region, a coverage >1000x was obtained in >93% of the sequence in all samples.

### Bioinformatic workflow

Sequencing reads were mapped to the human reference genome (GRCh37/hg19) using the Burrows-Wheeler Aligner–MEM algorithm (version 0.7.10).<sup>5</sup> Coverage along the targeted regions was analyzed using SAMtools (version 1.1).<sup>6</sup> Reads were filtered with a quality score >30. Variant calling was performed using the entire pipeline established on the MiSeq Reporter software (MSR; version 2.4.60). Variants found were annotated using ANNOVAR (version 2014Jul14).<sup>7</sup> Data were analyzed with MiSeq reporter (Illumina) and Integrative Genomics Viewer (IGV) software<sup>8,9</sup> against human genome assembly GRCh37/hg19. The *NOTCH1* mutational status was indicated as variant allele frequency (VAF, i.e. percentage of *NOTCH1* mutated DNA). Synonymous variants and polymorphisms described in the Single Nucleotide Polymorphism Database (dbSNP138), with a European population frequency higher than 1% (1000 Genomes Project database), were removed. *NOTCH1* mutations truncating the NOTCH1 protein were considered somatic mutations. Cases with truncating *NOTCH1* mutations, with a VAF between 45% and 55% were subjected to the cell sorting of CD3-positive cell population. In this sorted CD3-positive cell population, *NOTCH1* mutational status was investigated to further confirm the somatic origin of the mutation. The sensitivity of the NGS methodology was verified by performing four independent dilution experiments (3 somatic mutations and 1 SNP) to define the minimum detectable VAF. The approach was able to detect a minimum VAF of 1.3% (Figure S1A-B).

### Verification of detected *NOTCH1* mutations

The presence of c.7541-7542delCT was verified by using an ARMS-PCR strategy detecting the presence of the mutation (see Table S2 for primer sequences, and Figure S1C).<sup>1</sup> The presence of coding *NOTCH1* mutations other than the c.7541-7542delCT was verified by Sanger sequencing when clonal (i.e. with a VAF $\geq$ 12%, Table S3 for primer sequences and Figure S1B),<sup>10</sup> otherwise, when subclonal (i.e. with a VAF<12%) with a second independent NGS experiment. The 3' UTR *NOTCH1* mutations were verified by a RT-PCR strategy detecting the presence of the aberrant splicing in 23/26 cases (Table S4 for primer sequences and Figure S1D). In the remaining 3/26 cases, a second independent NGS experiment was performed to verify the presence of the 3' UTR *NOTCH1* mutation.

### **Quantitative real-time PCR (QRT-PCR)**

Transcript expression levels of genes of interest (i.e. *MS4A1*, *B2M*) were evaluated as reported.<sup>1</sup> Hydrolysis probe for *MS4A1* (Hs.PT.56a.24784282) was from Integrated DNA Technologies (IDT, Leuven, Belgium). Taqman Gene Expression assays for *B2M* (Hs00984230\_m1), was from Life Technologies (Monza, Italy). Reactions were done in triplicate from the same cDNA reaction (technical replicates) with FastStart Universal Probe Master (Roche, Milan, Italy) on a CFX96 (Bio-Rad, Milan, Italy) instrument. The relative amount of each gene was calculated utilizing the expression of *B2M* as internal control using the equation  $2^{-\Delta Ct}$  where  $\Delta Ct = (Ct^{gene} - Ct^{B2M})$ .<sup>1</sup>

### **CD20 expression**

CD20 expression was evaluated by flow cytometry with a fluorescein isothiocyanate (FITC)-conjugated anti-CD20 antibody (clone L27, BD Biosciences, Milan, Italy, Table S5).<sup>1</sup> CD20 levels were expressed as Mean Fluorescence Intensity (MFI). Irrelevant isotype-matched antibodies were used to determine background fluorescence. Data reproducibility was ensured using as instrumental set-up an application setting linked to Cytometer Setup & Tracking Beads (CS&T Beads, BD Biosciences) ran daily. All the experiments were analyzed with FACSDiva (BD Biosciences) or FlowJo (FlowJo LLC, Ashland, USA) softwares.<sup>1</sup>

### **Western blot (WB)**

WB was performed as reported,<sup>1</sup> using the following antibodies: anti-NOTCH1 intracytoplasmic domain (NICD, Val1744, clone D3B8, CST-Cell Signaling Technology, Leiden, The Netherlands), anti-NOTCH1 (clone D1E11, CST), anti-CD20 (clone L26, Abcam, Cambridge, UK), and anti- $\beta$ -actin (clone AC-74, Sigma, Milan, Italy) as control (Table S5). Total proteins were extracted in RIPA lysis buffer (Santa Cruz Biotechnology, Heidelberg, Germany), quantified through Bradford assay (Bio-Rad) and ran in 4-15% SDS-PAGE precast gels (Bio-Rad) prior to transfer to nitrocellulose membranes (Trans-Blot Turbo pack, Bio-Rad). Detection was performed with HRP-conjugated antibodies (GE Healthcare) and ClarityECL (Bio-Rad, Milan, Italy) or ECLprime (GE Healthcare, for high sensitivity conditions to detect CD20 expression) on a ChemiDoc Touch Imaging System (Bio-Rad). Image analysis was performed with ImageLab software (Bio-Rad).

### **Cell Sorting**

CLL cells from selected *NOTCH1* mutated cases were sorted according to CD20 expression by using the phycoerythrin (PE) -conjugated anti-CD20 antibody (clone L27, BD Biosciences, Milan, Italy). The CD20<sup>low</sup> or CD20<sup>high</sup> fractions were selected below the 25<sup>th</sup> percentile or above the 75<sup>th</sup> percentile of CD20 expression, respectively. Sorting was performed utilizing a FACSARIAIII cell sorter (BD Biosciences), as described.<sup>1</sup>

### **In-vitro treatment with $\gamma$ -secretase inhibitor (GSI)**

Purified primary CLL cells ( $2 \times 10^6$  cells/ml) were treated with the  $\gamma$ -secretase inhibitor (GSI L-685,458, Sigma, 10  $\mu$ M for 6-24 hours). In control experiments, equal volume of dimethyl sulfoxide (DMSO) was added.

### **Complement-dependent-citotoxicity (CDC) assay**

CDC assay was performed in primary CLL, as described.<sup>11</sup> Residual viable cells were evaluated by staining cells with 7-amino-actinomycin-D (BD Biosciences), as described.<sup>11,12</sup> In particular,  $2 \times 10^5$  primary CLL cells were incubated with rituximab (5  $\mu$ g/ml) or with ofatumumab (5  $\mu$ g/ml) in a final volume of 150  $\mu$ l for 10 min at room temperature prior to the addition of PNHS (25%) and a further incubation at 37° C for 1 hour.

**Statistical analysis**

All statistical analyses were performed with Medcalc software (Medcalc Software, Ostend, Belgium). Data were compared using two-sided Student's t-test for independent or paired (GSI treated/untreated) samples, as reported.<sup>1</sup> Variance similarity between compared groups was tested with Fisher's exact-test. Distribution normality was tested with D'Agostino-Pearson test. A p-value smaller than 0.05 was considered as significant.<sup>1</sup>

## References

- 1 Pozzo F, Bittolo T, Arruga F et al. NOTCH1 mutations associate with low CD20 level in chronic lymphocytic leukemia: evidence for a NOTCH1 mutation-driven epigenetic dysregulation. *Leukemia*. 2016;30(1):182-189.
- 2 Puente XS, Bea S, Valdes-Mas R et al. Non-coding recurrent mutations in chronic lymphocytic leukaemia. *Nature*. 2015;526(7574):519-524.
- 3 Koressaar T, Remm M. Enhancements and modifications of primer design program Primer3. *Bioinformatics*. 2007;23(10):1289-1291.
- 4 Untergasser A, Cutcutache I, Koressaar T et al. Primer3--new capabilities and interfaces. *Nucleic Acids Res*. 2012;40(15):e115.
- 5 Li H, Durbin R. Fast and accurate short read alignment with Burrows-Wheeler transform. *Bioinformatics*. 2009;25(14):1754-1760.
- 6 Li H, Handsaker B, Wysoker A et al. The Sequence Alignment/Map format and SAMtools. *Bioinformatics*. 2009;25(16):2078-2079.
- 7 Wang K, Li M, Hakonarson H. ANNOVAR: functional annotation of genetic variants from high-throughput sequencing data. *Nucleic Acids Res*. 2010;38(16):e164.
- 8 Robinson JT, Thorvaldsdottir H, Winckler W et al. Integrative genomics viewer. *Nat Biotechnol*. 2011;29(1):24-26.
- 9 Thorvaldsdottir H, Robinson JT, Mesirov JP. Integrative Genomics Viewer (IGV): high-performance genomics data visualization and exploration. *Brief Bioinform*. 2013;14(2):178-192.
- 10 Nadeu F, Delgado J, Royo C et al. Clinical impact of clonal and subclonal TP53, SF3B1, BIRC3, NOTCH1 and ATM mutations in chronic lymphocytic leukemia. *Blood*. 2016.
- 11 Macor P, Tripodo C, Zorzet S et al. In vivo targeting of human neutralizing antibodies against CD55 and CD59 to lymphoma cells increases the antitumor activity of rituximab. *Cancer Res*. 2007;67(21):10556-10563.
- 12 Zucchetto A, Vaisitti T, Benedetti D et al. The CD49d/CD29 complex is physically and functionally associated with CD38 in B-cell chronic lymphocytic leukemia cells. *Leukemia*. 2012;26(6):1301-1312.

**Table S1. Primers for targeted ultra-deep NGS.**

| Target Gene   | Target region | Forward primer (5'-3')      | Reverse primer (5'-3') |
|---------------|---------------|-----------------------------|------------------------|
| <i>NOTCH1</i> | exon_34       | GGGTGGGTTTCAGAAGATGTATCAAAG | TGCGCACCAGGTTGTACTC    |
| <i>NOTCH1</i> | exon_34       | AGCGCATGCATCACGACATC        | CACGTCTGACAGGTAGCCAT   |
| <i>NOTCH1</i> | exon_34       | CTCAAGGCACGGAGGAAGAAGTC     | GAGGTGGGCCAGTCTCAAAG   |
| <i>NOTCH1</i> | exon_34       | CATCGGGCACCTGAACGT          | GCAGAGGGTTGTATTGGTTTCG |
| <i>NOTCH1</i> | exon_34       | CAGTTTGAATGGTCAATGCGAGT     | ACTTTGCTGCTGCTGGATGTTT |
| <i>NOTCH1</i> | exon_34       | CAGCCACAAAACCTTACAGATGCA    | GTCCACAGGCGAGGAGTAGCT  |
| <i>NOTCH1</i> | exon_34       | ATGGCGGTGCACACTATTCTG       | ACCGAAGGCTTGGGAAAGGAAG |
| <i>NOTCH1</i> | exon_34       | TGAGAGCCAGGGTTTTTCCTA       | CCAGGAGCTTTTTGGACTATGC |

**Forward primer adapter:** TCGTCGGCAGCGTCAGATGTGTATAAGAGACAG

**Reverse primer adapter:** GTCTCGTGGGCTCGGAGATGTGTATAAGAGACAG

**Forward and reverse primer adapters are designed according to Illumina.**

**Table S2. Primers for ARMS-PCR.**

| Target Gene   | chr  | Genomic position (hg19) | DNA change | Control forward primer (5'-3') | Mutant forward primer (5'-3') | Control reverse primer (5'-3') |
|---------------|------|-------------------------|------------|--------------------------------|-------------------------------|--------------------------------|
| <i>NOTCH1</i> | chr9 | 139390648               | CAG>C      | AACTGGGCTGCGGTAC               | TCGGGACGGGGTGAGGA             | GCTTCCTTTCCCAAGCCTT            |

**Table S3. Primers for Sanger sequencing of the *NOTCH1* gene.**

| Forward primer (5'-3')  | Reverse primer (5'-3')  | Experiment        |
|-------------------------|-------------------------|-------------------|
| GGCCTGCAGTTGGTTAGATTTTC | GGGTGCACTCTTGGCATAACACA | DNA amplification |
| AAGGCTTGGGAAAGGAAGC     | CTCAACCACCTGCCTGGGAT    | Sequencing        |
| GGTAGCTCATCATCTGGGACA   | GCTGCTTCCTCTGGTGATGG    | Sequencing        |

**Table S4. Primers for detection of *NOTCH1* aberrant splicing in cases with mutations in the 3' UTR.**

| Target Gene   | Target region | Forward primer (5'-3') | Reverse primer (5'-3') |
|---------------|---------------|------------------------|------------------------|
| <i>NOTCH1</i> | 3'_UTR        | CCTAACAGGCAGGTGATGCT   | TACTCCTCGCCTGTGGACAA   |



**Table S5. Antibodies for western blotting and flow cytometry.**

| <b>Target Protein</b> | <b>Clone</b> | <b>Species</b> | <b>Conjugation</b> | <b>Vendor</b> | <b>ID</b> | <b>Dilution</b>    |
|-----------------------|--------------|----------------|--------------------|---------------|-----------|--------------------|
| NOTCH1                | D1E11        | Rabbit         |                    | CST           | #3608     | 1/3000 (WB)        |
| NICD                  | D3B8         | Rabbit         |                    | CST           | #4147     | 1/1000 (WB)        |
| CD20                  | L26          | Mouse          |                    | Abcam         | ab9475    | 1/500-1/2000 (WB)  |
| $\beta$ -Actin        | AC-15        | Mouse          | HRP                | Sigma         | A3854     | 1/100 000 (WB)     |
| Anti-Rabbit           |              | Donkey         | HRP                | GE Healthcare | NA-934    | 1/3000 (WB)        |
| Anti-Mouse            |              | Sheep          | HRP                | GE Healthcare | NA-931    | 1/1000-1/3000 (WB) |
| Mouse Isotype         | MOPC-21      | Mouse          | PE                 | BD            | 555749    | 20ul/test (Flow)   |
| CD20                  | L27          | Mouse          | PE                 | BD            | 345793    | 20ul/test (Flow)   |
| CD20                  | L27          | Mouse          | FITC               | BD            | 345792    | 20ul/test (Flow)   |
| CD19                  | HIB19        | Mouse          | APC                | BD            | 555415    | 20ul/test (Flow)   |
| CD3                   | SK7          | Mouse          | APC-H7             | BD            | 560275    | 20ul/test (Flow)   |

**Table S6. Biological characterization of the CLL cohort (662 cases).**

| ID # | <i>NOTCH1</i><br>status <sup>a</sup> | <i>IGHV</i><br>status <sup>b</sup> | FISH<br>status <sup>c</sup> | CD49d <sup>d</sup> | CD38 <sup>d</sup> | ZAP-70 <sup>d</sup> | CD20 MFI <sup>e</sup> |
|------|--------------------------------------|------------------------------------|-----------------------------|--------------------|-------------------|---------------------|-----------------------|
| 1    | wt                                   | m                                  | del13p                      | neg                | neg               | neg                 | 1996                  |
| 2    | mut                                  | um                                 | norm                        | pos                | pos               | pos                 | 4665                  |
| 3    | wt                                   | m                                  | del13p                      | neg                | neg               | neg                 | 3329                  |
| 4    | wt                                   | um                                 | del13p                      | neg                | pos               | neg                 | 2580                  |
| 5    | wt                                   | m                                  | del13p                      | pos                | neg               | neg                 | 5523                  |
| 6    | wt                                   | um                                 | norm                        | neg                | neg               | neg                 | 2298                  |
| 7    | mut                                  | na                                 | del17p                      | pos                | pos               | neg                 | 4253                  |
| 8    | mut                                  | m                                  | del17p                      | pos                | neg               | neg                 | 4322                  |
| 9    | mut                                  | um                                 | norm                        | pos                | pos               | pos                 | 1437                  |
| 10   | mut                                  | um                                 | tris12                      | pos                | pos               | pos                 | 2807                  |
| 11   | wt                                   | um                                 | norm                        | neg                | neg               | pos                 | 3449                  |
| 12   | wt                                   | um                                 | del11q                      | neg                | pos               | neg                 | 1671                  |
| 13   | mut                                  | um                                 | del17p                      | pos                | pos               | pos                 | 5597                  |
| 14   | wt                                   | um                                 | norm                        | pos                | neg               | neg                 | 31016                 |
| 15   | wt                                   | m                                  | tris12                      | pos                | neg               | neg                 | 36209                 |
| 16   | wt                                   | um                                 | tris12                      | pos                | pos               | neg                 | 22099                 |
| 17   | wt                                   | m                                  | del13p                      | neg                | neg               | pos                 | 2113                  |
| 18   | mut                                  | um                                 | tris12                      | pos                | pos               | pos                 | 2313                  |
| 19   | wt                                   | m                                  | del17p                      | neg                | neg               | pos                 | 679                   |
| 20   | wt                                   | um                                 | del11q                      | neg                | neg               | neg                 | 2315                  |
| 21   | wt                                   | m                                  | norm                        | neg                | neg               | pos                 | 1296                  |
| 22   | wt                                   | na                                 | del13p                      | neg                | neg               | neg                 | 2640                  |
| 23   | wt                                   | um                                 | del13p                      | pos                | pos               | pos                 | 1595                  |
| 24   | wt                                   | um                                 | norm                        | neg                | pos               | pos                 | 2254                  |
| 25   | wt                                   | m                                  | norm                        | neg                | neg               | neg                 | 1801                  |
| 26   | wt                                   | m                                  | norm                        | pos                | neg               | neg                 | 2877                  |
| 27   | wt                                   | m                                  | del11q                      | neg                | neg               | neg                 | 1133                  |
| 28   | wt                                   | m                                  | del11q                      | pos                | neg               | neg                 | 1741                  |
| 29   | wt                                   | m                                  | norm                        | neg                | neg               | neg                 | 1242                  |
| 30   | mut                                  | um                                 | del17p                      | pos                | pos               | pos                 | 1857                  |
| 31   | wt                                   | na                                 | norm                        | neg                | neg               | neg                 | 3815                  |
| 32   | wt                                   | um                                 | norm                        | pos                | pos               | pos                 | 12058                 |
| 33   | wt                                   | m                                  | norm                        | neg                | neg               | neg                 | 1812                  |
| 34   | mut                                  | um                                 | tris12                      | pos                | pos               | pos                 | 3655                  |
| 35   | wt                                   | m                                  | del13p                      | neg                | neg               | neg                 | 8044                  |
| 36   | wt                                   | m                                  | del13p                      | neg                | neg               | neg                 | 2439                  |
| 37   | wt                                   | m                                  | norm                        | neg                | neg               | neg                 | 4822                  |
| 38   | mut                                  | um                                 | tris12                      | pos                | pos               | neg                 | 6212                  |
| 39   | wt                                   | m                                  | norm                        | pos                | pos               | neg                 | 15099                 |
| 40   | wt                                   | um                                 | norm                        | neg                | pos               | neg                 | 1475                  |
| 41   | wt                                   | m                                  | del13p                      | neg                | neg               | neg                 | 2556                  |
| 42   | wt                                   | m                                  | norm                        | pos                | neg               | neg                 | 1387                  |
| 43   | wt                                   | m                                  | del13p                      | neg                | neg               | neg                 | 939                   |
| 44   | wt                                   | m                                  | del13p                      | neg                | neg               | neg                 | 2200                  |
| 45   | mut                                  | um                                 | tris12                      | pos                | neg               | pos                 | 2080                  |
| 46   | wt                                   | um                                 | norm                        | neg                | neg               | neg                 | 2432                  |
| 47   | wt                                   | um                                 | norm                        | neg                | neg               | pos                 | 2110                  |
| 48   | wt                                   | m                                  | del13p                      | neg                | neg               | neg                 | 3342                  |
| 49   | wt                                   | m                                  | norm                        | neg                | neg               | neg                 | 2478                  |
| 50   | wt                                   | m                                  | del13p                      | pos                | neg               | neg                 | 12184                 |
| 51   | wt                                   | um                                 | tris12                      | pos                | pos               | neg                 | 12555                 |
| 52   | wt                                   | m                                  | del13p                      | neg                | neg               | neg                 | 2393                  |
| 53   | wt                                   | m                                  | del13p                      | neg                | neg               | neg                 | 901                   |
| 54   | wt                                   | m                                  | tris12                      | pos                | neg               | neg                 | 32914                 |
| 55   | mut                                  | m                                  | norm                        | neg                | neg               | neg                 | 1366                  |
| 56   | wt                                   | um                                 | del13p                      | pos                | neg               | pos                 | 5099                  |
| 57   | wt                                   | um                                 | del11q                      | neg                | pos               | neg                 | 1004                  |
| 58   | wt                                   | m                                  | del13p                      | neg                | neg               | neg                 | 1663                  |

| ID # | <i>NOTCH1</i><br>status <sup>a</sup> | <i>IGHV</i><br>status <sup>b</sup> | FISH<br>status <sup>c</sup> | CD49d <sup>d</sup> | CD38 <sup>d</sup> | ZAP-70 <sup>d</sup> | CD20 MFI <sup>e</sup> |
|------|--------------------------------------|------------------------------------|-----------------------------|--------------------|-------------------|---------------------|-----------------------|
| 59   | wt                                   | m                                  | del13p                      | neg                | neg               | neg                 | 2553                  |
| 60   | wt                                   | um                                 | del13p                      | neg                | neg               | pos                 | 4944                  |
| 61   | wt                                   | m                                  | del13p                      | neg                | neg               | neg                 | 3057                  |
| 62   | wt                                   | m                                  | del13p                      | neg                | neg               | neg                 | 1636                  |
| 63   | wt                                   | um                                 | tris12                      | neg                | neg               | pos                 | 2892                  |
| 64   | wt                                   | m                                  | del13p                      | neg                | neg               | pos                 | 4821                  |
| 65   | wt                                   | m                                  | tris12                      | neg                | neg               | pos                 | 3308                  |
| 66   | mut                                  | um                                 | del13p                      | pos                | pos               | pos                 | 3756                  |
| 67   | wt                                   | m                                  | del11q                      | neg                | neg               | neg                 | 2707                  |
| 68   | wt                                   | m                                  | tris12                      | pos                | neg               | pos                 | 11727                 |
| 69   | wt                                   | um                                 | tris12                      | pos                | neg               | pos                 | 7689                  |
| 70   | wt                                   | m                                  | del13p                      | neg                | neg               | neg                 | 5431                  |
| 71   | wt                                   | m                                  | del13p                      | neg                | neg               | pos                 | 2469                  |
| 72   | mut                                  | um                                 | norm                        | pos                | neg               | pos                 | 3098                  |
| 73   | wt                                   | m                                  | del13p                      | neg                | neg               | neg                 | 3411                  |
| 74   | wt                                   | m                                  | norm                        | neg                | neg               | neg                 | 1213                  |
| 75   | wt                                   | m                                  | norm                        | neg                | neg               | neg                 | 3012                  |
| 76   | wt                                   | m                                  | norm                        | neg                | neg               | neg                 | 2963                  |
| 77   | wt                                   | um                                 | del13p                      | neg                | neg               | neg                 | 3579                  |
| 78   | wt                                   | um                                 | del11q                      | neg                | pos               | neg                 | 4502                  |
| 79   | wt                                   | m                                  | del13p                      | neg                | neg               | neg                 | 1925                  |
| 80   | wt                                   | um                                 | del17p                      | neg                | neg               | neg                 | 3886                  |
| 81   | wt                                   | m                                  | del13p                      | neg                | neg               | neg                 | 4178                  |
| 82   | mut                                  | um                                 | norm                        | neg                | pos               | pos                 | 4342                  |
| 83   | wt                                   | m                                  | tris12                      | pos                | pos               | neg                 | 11480                 |
| 84   | wt                                   | m                                  | del13p                      | pos                | pos               | neg                 | 4468                  |
| 85   | wt                                   | um                                 | del17p                      | pos                | neg               | pos                 | 1294                  |
| 86   | mut                                  | m                                  | del13p                      | neg                | neg               | neg                 | 5091                  |
| 87   | wt                                   | m                                  | del13p                      | neg                | neg               | neg                 | 5373                  |
| 88   | wt                                   | m                                  | del13p                      | pos                | neg               | pos                 | 8169                  |
| 89   | wt                                   | m                                  | del13p                      | neg                | neg               | neg                 | 1668                  |
| 90   | wt                                   | m                                  | tris12                      | pos                | neg               | pos                 | 25468                 |
| 91   | wt                                   | um                                 | del13p                      | neg                | neg               | pos                 | 4815                  |
| 92   | wt                                   | um                                 | tris12                      | neg                | neg               | pos                 | 2987                  |
| 93   | wt                                   | m                                  | del13p                      | neg                | neg               | neg                 | 3115                  |
| 94   | wt                                   | m                                  | norm                        | neg                | neg               | pos                 | 2769                  |
| 95   | mut                                  | m                                  | norm                        | neg                | neg               | pos                 | 2925                  |
| 96   | wt                                   | m                                  | del13p                      | pos                | neg               | pos                 | 4822                  |
| 97   | wt                                   | m                                  | norm                        | pos                | pos               | pos                 | 28751                 |
| 98   | wt                                   | na                                 | del17p                      | pos                | neg               | neg                 | 24530                 |
| 99   | wt                                   | m                                  | tris12                      | pos                | neg               | pos                 | 29097                 |
| 100  | wt                                   | m                                  | norm                        | neg                | neg               | neg                 | 2290                  |
| 101  | wt                                   | m                                  | del13p                      | neg                | neg               | neg                 | 4124                  |
| 102  | wt                                   | m                                  | del11q                      | neg                | neg               | pos                 | 1588                  |
| 103  | wt                                   | na                                 | del17p                      | pos                | neg               | neg                 | 690                   |
| 104  | wt                                   | m                                  | del13p                      | neg                | neg               | pos                 | 5276                  |
| 105  | mut                                  | m                                  | del13p                      | pos                | neg               | pos                 | 979                   |
| 106  | wt                                   | na                                 | del17p                      | pos                | neg               | pos                 | 2431                  |
| 107  | wt                                   | m                                  | del13p                      | neg                | neg               | pos                 | 2093                  |
| 108  | wt                                   | m                                  | del17p                      | neg                | neg               | neg                 | 2368                  |
| 109  | wt                                   | m                                  | del13p                      | pos                | pos               | neg                 | 24048                 |
| 110  | wt                                   | um                                 | norm                        | pos                | pos               | pos                 | 2695                  |
| 111  | wt                                   | um                                 | norm                        | pos                | pos               | pos                 | 1767                  |
| 112  | mut                                  | na                                 | norm                        | neg                | neg               | neg                 | 1248                  |
| 113  | wt                                   | um                                 | del13p                      | pos                | neg               | pos                 | 7866                  |
| 114  | wt                                   | m                                  | del13p                      | neg                | neg               | neg                 | 7431                  |
| 115  | wt                                   | m                                  | del13p                      | neg                | neg               | neg                 | 2082                  |
| 116  | wt                                   | na                                 | del13p                      | neg                | neg               | neg                 | 1288                  |
| 117  | wt                                   | m                                  | del17p                      | na                 | na                | pos                 | 5932                  |
| 118  | wt                                   | m                                  | del13p                      | neg                | neg               | neg                 | 1954                  |
| 119  | wt                                   | na                                 | del17p                      | neg                | pos               | neg                 | 1189                  |

| ID # | <i>NOTCH1</i><br>status <sup>a</sup> | <i>IGHV</i><br>status <sup>b</sup> | FISH<br>status <sup>c</sup> | CD49d <sup>d</sup> | CD38 <sup>d</sup> | ZAP-70 <sup>d</sup> | CD20 MFI <sup>e</sup> |
|------|--------------------------------------|------------------------------------|-----------------------------|--------------------|-------------------|---------------------|-----------------------|
| 120  | wt                                   | na                                 | del17p                      | neg                | neg               | neg                 | 4230                  |
| 121  | mut                                  | um                                 | norm                        | pos                | pos               | pos                 | 1835                  |
| 122  | wt                                   | m                                  | del13p                      | pos                | neg               | pos                 | 3912                  |
| 123  | wt                                   | m                                  | del13p                      | neg                | neg               | pos                 | 3213                  |
| 124  | wt                                   | m                                  | del17p                      | neg                | neg               | pos                 | 3064                  |
| 125  | wt                                   | na                                 | del17p                      | neg                | neg               | neg                 | 1235                  |
| 126  | mut                                  | na                                 | del13p                      | neg                | pos               | pos                 | 1471                  |
| 127  | wt                                   | na                                 | del13p                      | neg                | neg               | pos                 | 2091                  |
| 128  | wt                                   | na                                 | del13p                      | neg                | neg               | pos                 | 2315                  |
| 129  | wt                                   | um                                 | norm                        | pos                | neg               | pos                 | 3720                  |
| 130  | wt                                   | na                                 | norm                        | pos                | neg               | pos                 | 3552                  |
| 131  | wt                                   | m                                  | norm                        | pos                | pos               | pos                 | 4600                  |
| 132  | wt                                   | m                                  | norm                        | pos                | neg               | pos                 | 2797                  |
| 133  | wt                                   | m                                  | del13p                      | neg                | neg               | pos                 | 3520                  |
| 134  | wt                                   | m                                  | norm                        | neg                | neg               | pos                 | 2380                  |
| 135  | mut                                  | m                                  | del13p                      | neg                | neg               | pos                 | 3951                  |
| 136  | wt                                   | m                                  | del13p                      | neg                | neg               | pos                 | 3354                  |
| 137  | wt                                   | na                                 | del13p                      | neg                | neg               | pos                 | 1916                  |
| 138  | wt                                   | um                                 | tris12                      | pos                | pos               | pos                 | 2065                  |
| 139  | wt                                   | na                                 | del17p                      | neg                | neg               | pos                 | 1640                  |
| 140  | mut                                  | na                                 | tris12                      | pos                | neg               | pos                 | 1844                  |
| 141  | wt                                   | na                                 | del13p                      | neg                | neg               | pos                 | 2470                  |
| 142  | wt                                   | m                                  | del13p                      | neg                | neg               | neg                 | 2320                  |
| 143  | wt                                   | um                                 | del13p                      | pos                | neg               | pos                 | 1108                  |
| 144  | wt                                   | m                                  | norm                        | neg                | neg               | pos                 | 2386                  |
| 145  | wt                                   | m                                  | del13p                      | neg                | neg               | pos                 | 3109                  |
| 146  | wt                                   | um                                 | del13p                      | neg                | neg               | neg                 | 2172                  |
| 147  | wt                                   | um                                 | del17p                      | pos                | pos               | pos                 | 1945                  |
| 148  | wt                                   | m                                  | del13p                      | neg                | neg               | pos                 | 3069                  |
| 149  | wt                                   | m                                  | del11q                      | pos                | neg               | pos                 | 20820                 |
| 150  | wt                                   | m                                  | del13p                      | neg                | neg               | neg                 | 2808                  |
| 151  | wt                                   | m                                  | del13p                      | neg                | neg               | pos                 | 1741                  |
| 152  | mut                                  | um                                 | del13p                      | pos                | pos               | pos                 | 2264                  |
| 153  | mut                                  | um                                 | norm                        | neg                | pos               | pos                 | 3504                  |
| 154  | wt                                   | m                                  | norm                        | neg                | neg               | pos                 | 1584                  |
| 155  | wt                                   | um                                 | del11q                      | pos                | pos               | pos                 | 3152                  |
| 156  | wt                                   | um                                 | norm                        | neg                | neg               | pos                 | 2506                  |
| 157  | wt                                   | m                                  | norm                        | neg                | neg               | pos                 | 2300                  |
| 158  | mut                                  | um                                 | del17p                      | neg                | pos               | pos                 | 2297                  |
| 159  | wt                                   | m                                  | norm                        | pos                | pos               | pos                 | 10889                 |
| 160  | wt                                   | m                                  | norm                        | pos                | pos               | neg                 | 6564                  |
| 161  | wt                                   | um                                 | del17p                      | neg                | neg               | pos                 | 3595                  |
| 162  | wt                                   | m                                  | del17p                      | neg                | neg               | pos                 | 2027                  |
| 163  | mut                                  | um                                 | del13p                      | pos                | pos               | pos                 | 3233                  |
| 164  | wt                                   | m                                  | del13p                      | pos                | neg               | pos                 | 2615                  |
| 165  | wt                                   | m                                  | del13p                      | neg                | neg               | pos                 | 1380                  |
| 166  | wt                                   | m                                  | del17p                      | pos                | neg               | pos                 | 9638                  |
| 167  | mut                                  | um                                 | tris12                      | pos                | pos               | pos                 | 2126                  |
| 168  | wt                                   | um                                 | norm                        | pos                | pos               | pos                 | 4138                  |
| 169  | wt                                   | m                                  | norm                        | neg                | neg               | pos                 | 2378                  |
| 170  | wt                                   | um                                 | del17p                      | neg                | neg               | pos                 | 1773                  |
| 171  | wt                                   | m                                  | tris12                      | pos                | pos               | pos                 | 26131                 |
| 172  | wt                                   | m                                  | del13p                      | neg                | neg               | neg                 | 1939                  |
| 173  | wt                                   | na                                 | del13p                      | neg                | neg               | neg                 | 1727                  |
| 174  | wt                                   | um                                 | del11q                      | neg                | neg               | pos                 | 3177                  |
| 175  | mut                                  | na                                 | del11q                      | neg                | neg               | pos                 | 3054                  |
| 176  | wt                                   | um                                 | del11q                      | neg                | neg               | neg                 | 2481                  |
| 177  | wt                                   | m                                  | tris12                      | pos                | pos               | pos                 | 16810                 |
| 178  | mut                                  | um                                 | tris12                      | pos                | neg               | pos                 | 2477                  |
| 179  | wt                                   | um                                 | del11q                      | neg                | pos               | pos                 | 3181                  |
| 180  | wt                                   | m                                  | tris12                      | neg                | neg               | pos                 | 3489                  |

| ID # | <i>NOTCH1</i><br>status <sup>a</sup> | <i>IGHV</i><br>status <sup>b</sup> | FISH<br>status <sup>c</sup> | CD49d <sup>d</sup> | CD38 <sup>d</sup> | ZAP-70 <sup>d</sup> | CD20 MFI <sup>e</sup> |
|------|--------------------------------------|------------------------------------|-----------------------------|--------------------|-------------------|---------------------|-----------------------|
| 181  | wt                                   | um                                 | del13p                      | neg                | neg               | pos                 | 1600                  |
| 182  | mut                                  | m                                  | del13p                      | neg                | neg               | pos                 | 4406                  |
| 183  | wt                                   | m                                  | del17p                      | neg                | neg               | neg                 | 1894                  |
| 184  | wt                                   | um                                 | tris12                      | pos                | neg               | pos                 | 1276                  |
| 185  | wt                                   | m                                  | del13p                      | neg                | neg               | na                  | 3512                  |
| 186  | mut                                  | um                                 | tris12                      | pos                | neg               | na                  | 3282                  |
| 187  | wt                                   | um                                 | del13p                      | neg                | pos               | na                  | 1721                  |
| 188  | wt                                   | um                                 | norm                        | neg                | neg               | pos                 | 1651                  |
| 189  | wt                                   | m                                  | del13p                      | neg                | neg               | pos                 | 1356                  |
| 190  | wt                                   | m                                  | del13p                      | neg                | neg               | pos                 | 3865                  |
| 191  | wt                                   | m                                  | del13p                      | neg                | neg               | pos                 | 1583                  |
| 192  | mut                                  | um                                 | tris12                      | pos                | pos               | pos                 | 5283                  |
| 193  | wt                                   | m                                  | tris12                      | pos                | pos               | pos                 | 25248                 |
| 194  | wt                                   | um                                 | del13p                      | neg                | neg               | pos                 | 804                   |
| 195  | wt                                   | m                                  | del13p                      | neg                | neg               | pos                 | 5983                  |
| 196  | wt                                   | m                                  | del13p                      | neg                | neg               | pos                 | 3812                  |
| 197  | wt                                   | m                                  | del13p                      | pos                | neg               | pos                 | 3528                  |
| 198  | wt                                   | na                                 | del17p                      | neg                | neg               | neg                 | 4950                  |
| 199  | wt                                   | m                                  | del17p                      | pos                | neg               | pos                 | 20018                 |
| 200  | wt                                   | m                                  | del13p                      | neg                | neg               | pos                 | 2549                  |
| 201  | wt                                   | m                                  | del11q                      | neg                | neg               | pos                 | 4420                  |
| 202  | wt                                   | m                                  | tris12                      | pos                | pos               | pos                 | 14291                 |
| 203  | wt                                   | m                                  | del17p                      | neg                | neg               | pos                 | 1833                  |
| 204  | wt                                   | m                                  | del17p                      | neg                | neg               | pos                 | 2054                  |
| 205  | mut                                  | m                                  | tris12                      | pos                | neg               | pos                 | 4162                  |
| 206  | wt                                   | m                                  | tris12                      | pos                | pos               | pos                 | 5402                  |
| 207  | mut                                  | um                                 | tris12                      | neg                | pos               | pos                 | 1222                  |
| 208  | wt                                   | um                                 | del13p                      | neg                | neg               | pos                 | 1037                  |
| 209  | wt                                   | m                                  | tris12                      | pos                | neg               | pos                 | 7621                  |
| 210  | mut                                  | um                                 | norm                        | neg                | neg               | pos                 | 1160                  |
| 211  | wt                                   | m                                  | del17p                      | neg                | neg               | pos                 | 1995                  |
| 212  | mut                                  | um                                 | del17p                      | pos                | pos               | pos                 | 1814                  |
| 213  | mut                                  | um                                 | norm                        | pos                | pos               | pos                 | 472                   |
| 214  | mut                                  | um                                 | del17p                      | pos                | pos               | pos                 | 1470                  |
| 215  | wt                                   | um                                 | norm                        | pos                | pos               | pos                 | 573                   |
| 216  | mut                                  | m                                  | norm                        | neg                | pos               | pos                 | 588                   |
| 217  | wt                                   | m                                  | del11q                      | neg                | neg               | pos                 | 1377                  |
| 218  | wt                                   | um                                 | del17p                      | neg                | neg               | pos                 | 1844                  |
| 219  | wt                                   | m                                  | del13p                      | pos                | neg               | pos                 | 2090                  |
| 220  | wt                                   | m                                  | norm                        | pos                | neg               | pos                 | 1359                  |
| 221  | wt                                   | m                                  | norm                        | pos                | neg               | pos                 | 963                   |
| 222  | mut                                  | um                                 | norm                        | pos                | neg               | pos                 | 228                   |
| 223  | wt                                   | m                                  | norm                        | pos                | neg               | neg                 | 3255                  |
| 224  | wt                                   | m                                  | norm                        | pos                | pos               | pos                 | 9336                  |
| 225  | wt                                   | um                                 | del13p                      | pos                | pos               | pos                 | 1085                  |
| 226  | wt                                   | um                                 | norm                        | pos                | pos               | pos                 | 8508                  |
| 227  | wt                                   | m                                  | del13p                      | neg                | neg               | pos                 | 984                   |
| 228  | wt                                   | m                                  | del17p                      | neg                | neg               | pos                 | 3804                  |
| 229  | wt                                   | m                                  | norm                        | pos                | neg               | pos                 | 1541                  |
| 230  | mut                                  | um                                 | tris12                      | pos                | neg               | pos                 | 2661                  |
| 231  | wt                                   | m                                  | del17p                      | neg                | neg               | pos                 | 1602                  |
| 232  | mut                                  | um                                 | tris12                      | pos                | pos               | pos                 | 772                   |
| 233  | wt                                   | um                                 | del11q                      | neg                | neg               | pos                 | 478                   |
| 234  | mut                                  | um                                 | tris12                      | pos                | pos               | pos                 | 4192                  |
| 235  | wt                                   | m                                  | norm                        | neg                | neg               | pos                 | 3234                  |
| 236  | wt                                   | na                                 | del13p                      | neg                | neg               | neg                 | 2426                  |
| 237  | wt                                   | m                                  | norm                        | neg                | neg               | neg                 | 825                   |
| 238  | wt                                   | um                                 | del11q                      | pos                | pos               | pos                 | 521                   |
| 239  | wt                                   | m                                  | del17p                      | pos                | neg               | pos                 | 11921                 |
| 240  | wt                                   | m                                  | del13p                      | pos                | pos               | pos                 | 13057                 |
| 241  | wt                                   | m                                  | del17p                      | neg                | neg               | pos                 | 1514                  |

| ID # | <i>NOTCH1</i><br>status <sup>a</sup> | <i>IGHV</i><br>status <sup>b</sup> | FISH<br>status <sup>c</sup> | CD49d <sup>d</sup> | CD38 <sup>d</sup> | ZAP-70 <sup>d</sup> | CD20 MFI <sup>e</sup> |
|------|--------------------------------------|------------------------------------|-----------------------------|--------------------|-------------------|---------------------|-----------------------|
| 242  | wt                                   | m                                  | tris12                      | neg                | neg               | pos                 | 1734                  |
| 243  | wt                                   | m                                  | tris12                      | neg                | neg               | pos                 | 901                   |
| 244  | wt                                   | m                                  | tris12                      | pos                | pos               | pos                 | 5737                  |
| 245  | wt                                   | m                                  | del13p                      | neg                | neg               | neg                 | 837                   |
| 246  | wt                                   | um                                 | del13p                      | neg                | pos               | pos                 | 3699                  |
| 247  | wt                                   | m                                  | del11q                      | pos                | neg               | neg                 | 963                   |
| 248  | wt                                   | m                                  | del13p                      | pos                | pos               | pos                 | 11136                 |
| 249  | wt                                   | m                                  | del11q                      | pos                | pos               | pos                 | 6412                  |
| 250  | wt                                   | m                                  | del13p                      | pos                | neg               | neg                 | 1272                  |
| 251  | wt                                   | m                                  | del13p                      | neg                | neg               | neg                 | 1885                  |
| 252  | wt                                   | m                                  | norm                        | pos                | neg               | pos                 | 6778                  |
| 253  | mut                                  | um                                 | tris12                      | pos                | neg               | pos                 | 1299                  |
| 254  | wt                                   | m                                  | del13p                      | pos                | neg               | pos                 | 561                   |
| 255  | wt                                   | m                                  | norm                        | na                 | na                | pos                 | 11484                 |
| 256  | wt                                   | um                                 | tris12                      | pos                | neg               | pos                 | 10704                 |
| 257  | wt                                   | um                                 | del17p                      | pos                | neg               | pos                 | 1326                  |
| 258  | wt                                   | m                                  | del13p                      | neg                | neg               | pos                 | 1218                  |
| 259  | mut                                  | um                                 | del11q                      | neg                | neg               | pos                 | 995                   |
| 260  | wt                                   | m                                  | del13p                      | neg                | neg               | pos                 | 1472                  |
| 261  | wt                                   | m                                  | del17p                      | pos                | neg               | pos                 | 17614                 |
| 262  | wt                                   | m                                  | del13p                      | neg                | neg               | pos                 | 801                   |
| 263  | wt                                   | m                                  | del13p                      | neg                | neg               | pos                 | 2076                  |
| 264  | wt                                   | um                                 | tris12                      | pos                | pos               | pos                 | 2395                  |
| 265  | wt                                   | m                                  | del17p                      | pos                | neg               | pos                 | 834                   |
| 266  | wt                                   | um                                 | del17p                      | neg                | pos               | pos                 | 525                   |
| 267  | wt                                   | m                                  | norm                        | neg                | neg               | pos                 | 695                   |
| 268  | wt                                   | um                                 | norm                        | pos                | neg               | pos                 | 904                   |
| 269  | wt                                   | m                                  | del13p                      | neg                | neg               | neg                 | 1621                  |
| 270  | mut                                  | um                                 | norm                        | pos                | pos               | pos                 | 1702                  |
| 271  | wt                                   | m                                  | del13p                      | neg                | neg               | pos                 | 1296                  |
| 272  | wt                                   | m                                  | del17p                      | neg                | neg               | pos                 | 568                   |
| 273  | wt                                   | m                                  | del13p                      | neg                | neg               | pos                 | 434                   |
| 274  | wt                                   | m                                  | del13p                      | neg                | neg               | pos                 | 2049                  |
| 275  | wt                                   | um                                 | tris12                      | pos                | neg               | pos                 | 5533                  |
| 276  | mut                                  | m                                  | del13p                      | pos                | neg               | pos                 | 2646                  |
| 277  | wt                                   | m                                  | del13p                      | neg                | neg               | pos                 | 996                   |
| 278  | wt                                   | m                                  | del17p                      | pos                | neg               | pos                 | 1469                  |
| 279  | wt                                   | um                                 | del17p                      | pos                | neg               | pos                 | 2647                  |
| 280  | wt                                   | um                                 | tris12                      | pos                | pos               | pos                 | 5670                  |
| 281  | wt                                   | na                                 | del13p                      | neg                | neg               | pos                 | 1540                  |
| 282  | wt                                   | m                                  | del17p                      | neg                | neg               | pos                 | 3321                  |
| 283  | wt                                   | m                                  | norm                        | neg                | neg               | pos                 | 711                   |
| 284  | wt                                   | um                                 | norm                        | neg                | pos               | pos                 | 1194                  |
| 285  | wt                                   | um                                 | del11q                      | neg                | pos               | pos                 | 1121                  |
| 286  | mut                                  | um                                 | tris12                      | pos                | pos               | pos                 | 1686                  |
| 287  | mut                                  | um                                 | del13p                      | neg                | neg               | pos                 | 803                   |
| 288  | wt                                   | m                                  | norm                        | pos                | neg               | pos                 | 646                   |
| 289  | mut                                  | um                                 | tris12                      | pos                | pos               | pos                 | 1945                  |
| 290  | mut                                  | na                                 | norm                        | neg                | pos               | pos                 | 796                   |
| 291  | mut                                  | um                                 | del13p                      | pos                | pos               | pos                 | 1007                  |
| 292  | wt                                   | um                                 | norm                        | pos                | pos               | pos                 | 642                   |
| 293  | mut                                  | m                                  | tris12                      | neg                | neg               | pos                 | 3437                  |
| 294  | wt                                   | um                                 | norm                        | pos                | pos               | pos                 | 2158                  |
| 295  | wt                                   | um                                 | tris12                      | neg                | neg               | pos                 | 186                   |
| 296  | wt                                   | m                                  | del13p                      | neg                | neg               | neg                 | 205                   |
| 297  | wt                                   | m                                  | del13p                      | neg                | neg               | pos                 | 1957                  |
| 298  | wt                                   | m                                  | del13p                      | neg                | neg               | neg                 | 3616                  |
| 299  | wt                                   | m                                  | del13p                      | pos                | neg               | pos                 | 8324                  |
| 300  | wt                                   | m                                  | del13p                      | neg                | neg               | neg                 | 698                   |
| 301  | wt                                   | m                                  | del13p                      | neg                | neg               | neg                 | 1255                  |
| 302  | wt                                   | m                                  | tris12                      | pos                | neg               | neg                 | 10801                 |

| ID # | <i>NOTCH1</i><br>status <sup>a</sup> | <i>IGHV</i><br>status <sup>b</sup> | FISH<br>status <sup>c</sup> | CD49d <sup>d</sup> | CD38 <sup>d</sup> | ZAP-70 <sup>d</sup> | CD20 MFI <sup>e</sup> |
|------|--------------------------------------|------------------------------------|-----------------------------|--------------------|-------------------|---------------------|-----------------------|
| 303  | wt                                   | um                                 | del17p                      | neg                | pos               | pos                 | 1904                  |
| 304  | wt                                   | na                                 | del13p                      | neg                | neg               | neg                 | 141                   |
| 305  | mut                                  | um                                 | del13p                      | pos                | pos               | neg                 | 54                    |
| 306  | wt                                   | m                                  | del13p                      | neg                | neg               | neg                 | 713                   |
| 307  | wt                                   | m                                  | del13p                      | neg                | neg               | pos                 | 1038                  |
| 308  | mut                                  | um                                 | tris12                      | pos                | neg               | pos                 | 1516                  |
| 309  | wt                                   | m                                  | norm                        | neg                | neg               | pos                 | 1132                  |
| 310  | mut                                  | um                                 | del13p                      | neg                | pos               | pos                 | 2205                  |
| 311  | wt                                   | m                                  | norm                        | pos                | neg               | pos                 | 18411                 |
| 312  | wt                                   | m                                  | tris12                      | pos                | neg               | neg                 | 6021                  |
| 313  | mut                                  | m                                  | del13p                      | neg                | neg               | neg                 | 1783                  |
| 314  | wt                                   | um                                 | del11q                      | neg                | neg               | pos                 | 1956                  |
| 315  | wt                                   | m                                  | del13p                      | neg                | neg               | neg                 | 419                   |
| 316  | wt                                   | um                                 | del13p                      | neg                | neg               | neg                 | 2437                  |
| 317  | wt                                   | m                                  | del13p                      | neg                | neg               | neg                 | 2184                  |
| 318  | wt                                   | um                                 | norm                        | neg                | neg               | neg                 | 752                   |
| 319  | wt                                   | m                                  | del13p                      | neg                | neg               | neg                 | 1408                  |
| 320  | wt                                   | um                                 | tris12                      | pos                | pos               | neg                 | 3187                  |
| 321  | wt                                   | um                                 | del11q                      | neg                | pos               | pos                 | 1413                  |
| 322  | mut                                  | um                                 | tris12                      | pos                | pos               | pos                 | 709                   |
| 323  | mut                                  | um                                 | del11q                      | neg                | pos               | pos                 | 2355                  |
| 324  | wt                                   | m                                  | del13p                      | pos                | neg               | neg                 | 17032                 |
| 325  | wt                                   | um                                 | norm                        | neg                | pos               | pos                 | 1478                  |
| 326  | wt                                   | m                                  | del13p                      | neg                | neg               | neg                 | 993                   |
| 327  | wt                                   | m                                  | norm                        | neg                | pos               | pos                 | 1207                  |
| 328  | wt                                   | m                                  | del13p                      | neg                | neg               | neg                 | 1639                  |
| 329  | wt                                   | m                                  | del13p                      | neg                | neg               | neg                 | 3053                  |
| 330  | wt                                   | m                                  | del13p                      | neg                | neg               | pos                 | 2415                  |
| 331  | mut                                  | um                                 | del13p                      | neg                | neg               | pos                 | 853                   |
| 332  | wt                                   | um                                 | norm                        | pos                | pos               | pos                 | 957                   |
| 333  | wt                                   | m                                  | tris12                      | neg                | neg               | neg                 | 1339                  |
| 334  | wt                                   | m                                  | norm                        | neg                | neg               | neg                 | 1094                  |
| 335  | wt                                   | m                                  | del13p                      | neg                | neg               | neg                 | 739                   |
| 336  | wt                                   | um                                 | del11q                      | neg                | neg               | pos                 | 411                   |
| 337  | wt                                   | m                                  | norm                        | neg                | neg               | neg                 | 578                   |
| 338  | wt                                   | m                                  | del13p                      | neg                | neg               | neg                 | 1962                  |
| 339  | wt                                   | m                                  | norm                        | neg                | neg               | neg                 | 1233                  |
| 340  | mut                                  | um                                 | tris12                      | pos                | pos               | pos                 | 1455                  |
| 341  | wt                                   | m                                  | norm                        | neg                | pos               | neg                 | 751                   |
| 342  | mut                                  | um                                 | del13p                      | neg                | pos               | pos                 | 610                   |
| 343  | wt                                   | m                                  | del13p                      | neg                | neg               | pos                 | 1647                  |
| 344  | wt                                   | m                                  | tris12                      | pos                | neg               | neg                 | 2080                  |
| 345  | wt                                   | m                                  | del13p                      | neg                | neg               | neg                 | 615                   |
| 346  | mut                                  | um                                 | del17p                      | pos                | pos               | pos                 | 2434                  |
| 347  | wt                                   | m                                  | del13p                      | neg                | neg               | pos                 | 2598                  |
| 348  | wt                                   | um                                 | del11q                      | pos                | pos               | pos                 | 2314                  |
| 349  | wt                                   | m                                  | norm                        | neg                | neg               | pos                 | 358                   |
| 350  | wt                                   | m                                  | del13p                      | neg                | neg               | pos                 | 2481                  |
| 351  | wt                                   | um                                 | norm                        | neg                | neg               | pos                 | 588                   |
| 352  | wt                                   | m                                  | del13p                      | neg                | neg               | pos                 | 1330                  |
| 353  | wt                                   | m                                  | del13p                      | neg                | neg               | neg                 | 910                   |
| 354  | wt                                   | um                                 | del11q                      | neg                | neg               | pos                 | 1630                  |
| 355  | wt                                   | m                                  | norm                        | neg                | neg               | pos                 | 3940                  |
| 356  | wt                                   | um                                 | del11q                      | neg                | neg               | pos                 | 554                   |
| 357  | wt                                   | m                                  | norm                        | neg                | neg               | pos                 | 258                   |
| 358  | wt                                   | m                                  | norm                        | pos                | neg               | neg                 | 1112                  |
| 359  | wt                                   | um                                 | del13p                      | pos                | neg               | pos                 | 2046                  |
| 360  | wt                                   | na                                 | del13p                      | neg                | neg               | pos                 | 918                   |
| 361  | wt                                   | m                                  | del13p                      | neg                | neg               | pos                 | 2356                  |
| 362  | wt                                   | m                                  | del13p                      | neg                | neg               | pos                 | 1615                  |
| 363  | wt                                   | na                                 | del17p                      | neg                | neg               | neg                 | 690                   |

| ID # | <i>NOTCH1</i><br>status <sup>a</sup> | <i>IGHV</i><br>status <sup>b</sup> | FISH<br>status <sup>c</sup> | CD49d <sup>d</sup> | CD38 <sup>d</sup> | ZAP-70 <sup>d</sup> | CD20 MFI <sup>e</sup> |
|------|--------------------------------------|------------------------------------|-----------------------------|--------------------|-------------------|---------------------|-----------------------|
| 364  | wt                                   | um                                 | norm                        | pos                | pos               | pos                 | 4609                  |
| 365  | mut                                  | um                                 | tris12                      | pos                | pos               | pos                 | 3793                  |
| 366  | wt                                   | um                                 | del13p                      | neg                | pos               | pos                 | 3434                  |
| 367  | wt                                   | m                                  | tris12                      | pos                | neg               | pos                 | 4501                  |
| 368  | wt                                   | um                                 | norm                        | pos                | pos               | pos                 | 2256                  |
| 369  | mut                                  | um                                 | norm                        | pos                | pos               | pos                 | 2302                  |
| 370  | wt                                   | m                                  | norm                        | neg                | neg               | pos                 | 1716                  |
| 371  | wt                                   | m                                  | del13p                      | neg                | neg               | pos                 | 591                   |
| 372  | wt                                   | m                                  | del17p                      | pos                | neg               | pos                 | 6978                  |
| 373  | wt                                   | um                                 | del17p                      | pos                | neg               | pos                 | 2738                  |
| 374  | wt                                   | um                                 | del11q                      | neg                | neg               | pos                 | 802                   |
| 375  | wt                                   | m                                  | del13p                      | neg                | neg               | pos                 | 2553                  |
| 376  | wt                                   | um                                 | del11q                      | neg                | neg               | neg                 | 1796                  |
| 377  | wt                                   | m                                  | tris12                      | pos                | pos               | neg                 | 10857                 |
| 378  | wt                                   | m                                  | del13p                      | pos                | neg               | pos                 | 2254                  |
| 379  | wt                                   | m                                  | del17p                      | neg                | neg               | pos                 | 2526                  |
| 380  | wt                                   | m                                  | norm                        | pos                | neg               | pos                 | 12610                 |
| 381  | wt                                   | m                                  | tris12                      | neg                | neg               | pos                 | 3331                  |
| 382  | wt                                   | m                                  | del13p                      | pos                | neg               | pos                 | 14634                 |
| 383  | wt                                   | m                                  | norm                        | neg                | neg               | pos                 | 779                   |
| 384  | wt                                   | m                                  | del13p                      | neg                | neg               | neg                 | 1230                  |
| 385  | wt                                   | um                                 | norm                        | pos                | neg               | pos                 | 793                   |
| 386  | wt                                   | m                                  | del13p                      | neg                | neg               | pos                 | 1511                  |
| 387  | wt                                   | m                                  | norm                        | pos                | neg               | pos                 | 22258                 |
| 388  | wt                                   | m                                  | del13p                      | pos                | neg               | pos                 | 10987                 |
| 389  | wt                                   | m                                  | del13p                      | pos                | neg               | pos                 | 2003                  |
| 390  | mut                                  | um                                 | del11q                      | neg                | neg               | pos                 | 3086                  |
| 391  | wt                                   | um                                 | del13p                      | neg                | neg               | pos                 | 1391                  |
| 392  | wt                                   | m                                  | del13p                      | neg                | neg               | pos                 | 1524                  |
| 393  | wt                                   | m                                  | norm                        | pos                | neg               | pos                 | 17394                 |
| 394  | wt                                   | m                                  | tris12                      | pos                | pos               | pos                 | 10278                 |
| 395  | wt                                   | m                                  | del13p                      | neg                | neg               | pos                 | 2707                  |
| 396  | wt                                   | m                                  | del13p                      | neg                | neg               | neg                 | 2260                  |
| 397  | wt                                   | m                                  | del13p                      | neg                | neg               | pos                 | 3220                  |
| 398  | wt                                   | m                                  | del13p                      | neg                | neg               | neg                 | 1155                  |
| 399  | wt                                   | m                                  | del11q                      | neg                | pos               | pos                 | 3981                  |
| 400  | mut                                  | um                                 | tris12                      | pos                | pos               | pos                 | 2443                  |
| 401  | mut                                  | um                                 | del17p                      | pos                | neg               | neg                 | 1765                  |
| 402  | mut                                  | m                                  | tris12                      | neg                | pos               | pos                 | 2683                  |
| 403  | wt                                   | m                                  | del13p                      | neg                | neg               | neg                 | 2038                  |
| 404  | wt                                   | m                                  | norm                        | neg                | neg               | neg                 | 1414                  |
| 405  | wt                                   | um                                 | norm                        | pos                | pos               | pos                 | 3447                  |
| 406  | wt                                   | m                                  | tris12                      | pos                | pos               | pos                 | 6231                  |
| 407  | wt                                   | m                                  | del13p                      | neg                | neg               | pos                 | 2422                  |
| 408  | wt                                   | m                                  | norm                        | neg                | neg               | neg                 | 2969                  |
| 409  | wt                                   | m                                  | del13p                      | neg                | neg               | neg                 | 3289                  |
| 410  | wt                                   | m                                  | del13p                      | neg                | neg               | neg                 | 1572                  |
| 411  | wt                                   | m                                  | del17p                      | neg                | neg               | neg                 | 548                   |
| 412  | wt                                   | m                                  | norm                        | neg                | pos               | pos                 | 989                   |
| 413  | wt                                   | m                                  | del13p                      | neg                | neg               | neg                 | 1205                  |
| 414  | wt                                   | m                                  | del13p                      | pos                | pos               | pos                 | 2020                  |
| 415  | wt                                   | m                                  | del13p                      | neg                | neg               | neg                 | 2950                  |
| 416  | wt                                   | m                                  | norm                        | neg                | neg               | neg                 | 1185                  |
| 417  | wt                                   | m                                  | del13p                      | na                 | na                | neg                 | 4602                  |
| 418  | wt                                   | m                                  | norm                        | pos                | pos               | pos                 | 2251                  |
| 419  | wt                                   | um                                 | tris12                      | pos                | pos               | pos                 | 1953                  |
| 420  | wt                                   | m                                  | del17p                      | pos                | pos               | neg                 | 2754                  |
| 421  | wt                                   | m                                  | del13p                      | neg                | neg               | neg                 | 1883                  |
| 422  | wt                                   | um                                 | norm                        | neg                | neg               | pos                 | 1163                  |
| 423  | mut                                  | um                                 | del11q                      | neg                | pos               | pos                 | 2334                  |
| 424  | mut                                  | um                                 | del17p                      | neg                | neg               | pos                 | 697                   |



| ID # | <i>NOTCH1</i><br>status <sup>a</sup> | <i>IGHV</i><br>status <sup>b</sup> | FISH<br>status <sup>c</sup> | CD49d <sup>d</sup> | CD38 <sup>d</sup> | ZAP-70 <sup>d</sup> | CD20 MFI <sup>e</sup> |
|------|--------------------------------------|------------------------------------|-----------------------------|--------------------|-------------------|---------------------|-----------------------|
| 425  | wt                                   | m                                  | del13p                      | neg                | neg               | neg                 | 1659                  |
| 426  | wt                                   | m                                  | del13p                      | neg                | neg               | neg                 | 3500                  |
| 427  | mut                                  | um                                 | tris12                      | pos                | pos               | pos                 | 554                   |
| 428  | wt                                   | m                                  | norm                        | neg                | neg               | neg                 | 1638                  |
| 429  | wt                                   | um                                 | del13p                      | neg                | neg               | pos                 | 1586                  |
| 430  | mut                                  | um                                 | tris12                      | pos                | pos               | pos                 | 2404                  |
| 431  | wt                                   | um                                 | norm                        | neg                | neg               | neg                 | 2743                  |
| 432  | mut                                  | um                                 | del11q                      | neg                | neg               | neg                 | 2366                  |
| 433  | wt                                   | um                                 | del13p                      | neg                | neg               | neg                 | 1700                  |
| 434  | wt                                   | um                                 | tris12                      | neg                | neg               | neg                 | 622                   |
| 435  | wt                                   | m                                  | del13p                      | pos                | pos               | neg                 | 1808                  |
| 436  | wt                                   | um                                 | tris12                      | pos                | pos               | pos                 | 3374                  |
| 437  | wt                                   | m                                  | tris12                      | pos                | pos               | neg                 | 10364                 |
| 438  | wt                                   | m                                  | norm                        | pos                | neg               | neg                 | 3822                  |
| 439  | wt                                   | m                                  | del13p                      | neg                | neg               | neg                 | 3175                  |
| 440  | wt                                   | um                                 | del13p                      | neg                | neg               | pos                 | 968                   |
| 441  | wt                                   | um                                 | del11q                      | neg                | pos               | pos                 | 1076                  |
| 442  | wt                                   | m                                  | del13p                      | neg                | neg               | neg                 | 1029                  |
| 443  | wt                                   | m                                  | norm                        | pos                | neg               | neg                 | 7829                  |
| 444  | wt                                   | um                                 | del13p                      | neg                | neg               | neg                 | 628                   |
| 445  | wt                                   | um                                 | del11q                      | neg                | pos               | pos                 | 1800                  |
| 446  | wt                                   | m                                  | del13p                      | neg                | neg               | neg                 | 1226                  |
| 447  | wt                                   | m                                  | del13p                      | neg                | neg               | neg                 | 1128                  |
| 448  | wt                                   | m                                  | del13p                      | neg                | neg               | pos                 | 2453                  |
| 449  | wt                                   | um                                 | del13p                      | neg                | pos               | pos                 | 3874                  |
| 450  | wt                                   | um                                 | del17p                      | neg                | pos               | pos                 | 2227                  |
| 451  | wt                                   | na                                 | del13p                      | neg                | neg               | neg                 | 1650                  |
| 452  | wt                                   | m                                  | norm                        | neg                | neg               | pos                 | 9282                  |
| 453  | wt                                   | m                                  | norm                        | neg                | neg               | neg                 | 2168                  |
| 454  | wt                                   | m                                  | del13p                      | neg                | neg               | pos                 | 1680                  |
| 455  | mut                                  | m                                  | del17p                      | neg                | neg               | pos                 | 4669                  |
| 456  | mut                                  | m                                  | tris12                      | pos                | pos               | neg                 | 4053                  |
| 457  | mut                                  | m                                  | del13p                      | neg                | neg               | neg                 | 1581                  |
| 458  | wt                                   | um                                 | norm                        | neg                | neg               | pos                 | 1068                  |
| 459  | mut                                  | um                                 | tris12                      | pos                | neg               | pos                 | 1450                  |
| 460  | wt                                   | um                                 | norm                        | neg                | neg               | neg                 | 2305                  |
| 461  | mut                                  | um                                 | norm                        | pos                | pos               | pos                 | 1711                  |
| 462  | mut                                  | um                                 | del11q                      | pos                | pos               | pos                 | 1471                  |
| 463  | wt                                   | na                                 | norm                        | neg                | neg               | neg                 | 1450                  |
| 464  | wt                                   | m                                  | norm                        | neg                | neg               | neg                 | 27                    |
| 465  | wt                                   | um                                 | norm                        | pos                | neg               | neg                 | 2847                  |
| 466  | mut                                  | m                                  | norm                        | pos                | pos               | neg                 | 2177                  |
| 467  | wt                                   | m                                  | del13p                      | neg                | neg               | neg                 | 1362                  |
| 468  | mut                                  | um                                 | tris12                      | pos                | neg               | pos                 | 897                   |
| 469  | wt                                   | m                                  | norm                        | pos                | pos               | neg                 | 12362                 |
| 470  | mut                                  | um                                 | del13p                      | pos                | pos               | pos                 | 2242                  |
| 471  | wt                                   | um                                 | tris12                      | pos                | pos               | pos                 | 3111                  |
| 472  | wt                                   | um                                 | norm                        | neg                | neg               | pos                 | 391                   |
| 473  | wt                                   | m                                  | tris12                      | pos                | pos               | neg                 | 11468                 |
| 474  | wt                                   | m                                  | del13p                      | neg                | neg               | neg                 | 1801                  |
| 475  | wt                                   | m                                  | del17p                      | neg                | neg               | neg                 | 949                   |
| 476  | wt                                   | m                                  | tris12                      | pos                | neg               | pos                 | 5943                  |
| 477  | mut                                  | m                                  | del13p                      | neg                | neg               | neg                 | 1709                  |
| 478  | wt                                   | m                                  | norm                        | neg                | neg               | neg                 | 3772                  |
| 479  | wt                                   | m                                  | norm                        | pos                | neg               | neg                 | 15720                 |
| 480  | wt                                   | um                                 | del13p                      | neg                | pos               | neg                 | 655                   |
| 481  | wt                                   | um                                 | del13p                      | pos                | neg               | neg                 | 1350                  |
| 482  | wt                                   | um                                 | del17p                      | pos                | pos               | neg                 | 15505                 |
| 483  | mut                                  | um                                 | tris12                      | pos                | pos               | neg                 | 8648                  |
| 484  | wt                                   | um                                 | del11q                      | neg                | neg               | pos                 | 1085                  |
| 485  | wt                                   | m                                  | del13p                      | neg                | neg               | neg                 | 679                   |

| ID # | <i>NOTCH1</i><br>status <sup>a</sup> | <i>IGHV</i><br>status <sup>b</sup> | FISH<br>status <sup>c</sup> | CD49d <sup>d</sup> | CD38 <sup>d</sup> | ZAP-70 <sup>d</sup> | CD20 MFI <sup>e</sup> |
|------|--------------------------------------|------------------------------------|-----------------------------|--------------------|-------------------|---------------------|-----------------------|
| 486  | wt                                   | m                                  | del13p                      | neg                | pos               | pos                 | 3246                  |
| 487  | wt                                   | m                                  | del13p                      | neg                | neg               | pos                 | 1572                  |
| 488  | wt                                   | m                                  | tris12                      | pos                | pos               | pos                 | 8510                  |
| 489  | wt                                   | m                                  | del13p                      | neg                | neg               | neg                 | 1285                  |
| 490  | wt                                   | m                                  | del13p                      | neg                | neg               | neg                 | 4678                  |
| 491  | wt                                   | um                                 | norm                        | pos                | neg               | pos                 | 11253                 |
| 492  | wt                                   | m                                  | norm                        | pos                | neg               | neg                 | 1968                  |
| 493  | wt                                   | m                                  | tris12                      | pos                | neg               | neg                 | 9784                  |
| 494  | wt                                   | um                                 | del13p                      | neg                | neg               | pos                 | 1430                  |
| 495  | wt                                   | m                                  | tris12                      | pos                | neg               | neg                 | 12251                 |
| 496  | wt                                   | na                                 | norm                        | pos                | neg               | neg                 | 2014                  |
| 497  | mut                                  | um                                 | tris12                      | pos                | pos               | pos                 | 1062                  |
| 498  | wt                                   | m                                  | norm                        | neg                | neg               | neg                 | 1129                  |
| 499  | mut                                  | um                                 | del13p                      | neg                | neg               | pos                 | 2484                  |
| 500  | wt                                   | um                                 | del13p                      | neg                | neg               | pos                 | 2216                  |
| 501  | wt                                   | m                                  | del13p                      | pos                | pos               | pos                 | 2664                  |
| 502  | wt                                   | m                                  | del13p                      | pos                | neg               | neg                 | 1661                  |
| 503  | wt                                   | m                                  | norm                        | neg                | neg               | neg                 | 1469                  |
| 504  | wt                                   | m                                  | del13p                      | neg                | neg               | pos                 | 2075                  |
| 505  | wt                                   | m                                  | norm                        | pos                | neg               | neg                 | 2263                  |
| 506  | mut                                  | um                                 | del13p                      | pos                | neg               | pos                 | 579                   |
| 507  | wt                                   | m                                  | norm                        | pos                | pos               | neg                 | 1350                  |
| 508  | wt                                   | m                                  | norm                        | pos                | neg               | neg                 | 15024                 |
| 509  | wt                                   | m                                  | del13p                      | neg                | neg               | neg                 | 772                   |
| 510  | wt                                   | um                                 | tris12                      | pos                | pos               | pos                 | 3031                  |
| 511  | mut                                  | um                                 | tris12                      | pos                | neg               | pos                 | 7355                  |
| 512  | wt                                   | um                                 | del17p                      | neg                | neg               | neg                 | 890                   |
| 513  | mut                                  | na                                 | del13p                      | neg                | neg               | neg                 | 2681                  |
| 514  | wt                                   | m                                  | norm                        | neg                | neg               | pos                 | 1281                  |
| 515  | wt                                   | um                                 | del13p                      | neg                | neg               | neg                 | 234                   |
| 516  | wt                                   | m                                  | norm                        | pos                | neg               | pos                 | 11740                 |
| 517  | wt                                   | m                                  | del13p                      | neg                | neg               | neg                 | 3385                  |
| 518  | wt                                   | um                                 | del11q                      | pos                | pos               | pos                 | 1720                  |
| 519  | wt                                   | m                                  | norm                        | neg                | neg               | neg                 | 2423                  |
| 520  | wt                                   | m                                  | del13p                      | neg                | neg               | neg                 | 1750                  |
| 521  | wt                                   | um                                 | del13p                      | neg                | neg               | neg                 | 1335                  |
| 522  | wt                                   | m                                  | del13p                      | neg                | neg               | neg                 | 1543                  |
| 523  | wt                                   | m                                  | norm                        | pos                | neg               | neg                 | 12313                 |
| 524  | wt                                   | um                                 | norm                        | pos                | pos               | pos                 | 2466                  |
| 525  | wt                                   | um                                 | tris12                      | pos                | neg               | pos                 | 4008                  |
| 526  | wt                                   | m                                  | del13p                      | neg                | neg               | neg                 | 2030                  |
| 527  | mut                                  | um                                 | del13p                      | neg                | pos               | pos                 | 2289                  |
| 528  | wt                                   | um                                 | tris12                      | pos                | pos               | pos                 | 2382                  |
| 529  | wt                                   | m                                  | del13p                      | neg                | neg               | neg                 | 1817                  |
| 530  | wt                                   | m                                  | del13p                      | pos                | neg               | na                  | 882                   |
| 531  | wt                                   | um                                 | norm                        | pos                | pos               | pos                 | 1786                  |
| 532  | wt                                   | m                                  | del13p                      | neg                | neg               | neg                 | 3301                  |
| 533  | wt                                   | um                                 | norm                        | pos                | neg               | pos                 | 1542                  |
| 534  | wt                                   | um                                 | del11q                      | neg                | pos               | pos                 | 2212                  |
| 535  | mut                                  | um                                 | tris12                      | pos                | neg               | pos                 | 989                   |
| 536  | wt                                   | um                                 | del11q                      | neg                | neg               | neg                 | 3664                  |
| 537  | wt                                   | m                                  | del13p                      | pos                | neg               | pos                 | 5189                  |
| 538  | mut                                  | um                                 | norm                        | pos                | pos               | pos                 | 2778                  |
| 539  | wt                                   | um                                 | tris12                      | pos                | neg               | neg                 | 6035                  |
| 540  | wt                                   | um                                 | del17p                      | pos                | pos               | pos                 | 653                   |
| 541  | wt                                   | um                                 | norm                        | pos                | pos               | pos                 | 2328                  |
| 542  | wt                                   | m                                  | del13p                      | neg                | neg               | neg                 | 759                   |
| 543  | wt                                   | m                                  | norm                        | neg                | neg               | neg                 | 1644                  |
| 544  | wt                                   | m                                  | tris12                      | na                 | na                | neg                 | 16209                 |
| 545  | mut                                  | m                                  | del13p                      | neg                | neg               | neg                 | 1554                  |
| 546  | wt                                   | m                                  | tris12                      | neg                | neg               | neg                 | 1683                  |

| ID # | <i>NOTCH1</i><br>status <sup>a</sup> | <i>IGHV</i><br>status <sup>b</sup> | FISH<br>status <sup>c</sup> | CD49d <sup>d</sup> | CD38 <sup>d</sup> | ZAP-70 <sup>d</sup> | CD20 MFI <sup>e</sup> |
|------|--------------------------------------|------------------------------------|-----------------------------|--------------------|-------------------|---------------------|-----------------------|
| 547  | mut                                  | um                                 | tris12                      | pos                | neg               | pos                 | 1931                  |
| 548  | wt                                   | m                                  | norm                        | neg                | neg               | neg                 | 1467                  |
| 549  | wt                                   | m                                  | norm                        | neg                | neg               | neg                 | 19299                 |
| 550  | wt                                   | um                                 | tris12                      | pos                | pos               | pos                 | 10444                 |
| 551  | wt                                   | m                                  | del13p                      | neg                | neg               | neg                 | 1730                  |
| 552  | mut                                  | um                                 | tris12                      | pos                | pos               | pos                 | 2255                  |
| 553  | wt                                   | m                                  | del13p                      | neg                | neg               | neg                 | 2125                  |
| 554  | wt                                   | um                                 | tris12                      | pos                | neg               | pos                 | 2469                  |
| 555  | mut                                  | m                                  | del11q                      | neg                | pos               | neg                 | 1095                  |
| 556  | wt                                   | m                                  | del13p                      | neg                | neg               | neg                 | 996                   |
| 557  | wt                                   | um                                 | del17p                      | neg                | neg               | neg                 | 480                   |
| 558  | wt                                   | um                                 | norm                        | neg                | neg               | pos                 | 234                   |
| 559  | mut                                  | um                                 | del11q                      | neg                | neg               | pos                 | 2188                  |
| 560  | wt                                   | m                                  | tris12                      | pos                | pos               | neg                 | 7258                  |
| 561  | wt                                   | m                                  | del13p                      | neg                | neg               | neg                 | 1026                  |
| 562  | wt                                   | um                                 | norm                        | pos                | neg               | neg                 | 1569                  |
| 563  | wt                                   | m                                  | del11q                      | pos                | pos               | neg                 | 13620                 |
| 564  | wt                                   | m                                  | del13p                      | neg                | neg               | pos                 | 2356                  |
| 565  | wt                                   | m                                  | del13p                      | neg                | neg               | neg                 | 4434                  |
| 566  | wt                                   | m                                  | del13p                      | pos                | neg               | pos                 | 12399                 |
| 567  | wt                                   | m                                  | del13p                      | neg                | neg               | pos                 | 1846                  |
| 568  | wt                                   | m                                  | norm                        | neg                | neg               | neg                 | 864                   |
| 569  | wt                                   | um                                 | del13p                      | pos                | pos               | neg                 | 320                   |
| 570  | wt                                   | m                                  | del13p                      | neg                | neg               | na                  | 1695                  |
| 571  | mut                                  | m                                  | tris12                      | pos                | neg               | na                  | 4270                  |
| 572  | wt                                   | um                                 | norm                        | pos                | neg               | na                  | 697                   |
| 573  | wt                                   | um                                 | tris12                      | pos                | pos               | pos                 | 2776                  |
| 574  | mut                                  | um                                 | norm                        | pos                | pos               | pos                 | 419                   |
| 575  | wt                                   | m                                  | norm                        | pos                | neg               | pos                 | 21743                 |
| 576  | mut                                  | um                                 | tris12                      | neg                | neg               | pos                 | 522                   |
| 577  | mut                                  | um                                 | del17p                      | pos                | neg               | neg                 | 21                    |
| 578  | wt                                   | um                                 | del11q                      | pos                | neg               | pos                 | 81                    |
| 579  | mut                                  | um                                 | tris12                      | pos                | neg               | na                  | 1575                  |
| 580  | wt                                   | um                                 | del11q                      | neg                | neg               | na                  | 3486                  |
| 581  | wt                                   | m                                  | del13p                      | neg                | neg               | pos                 | 1632                  |
| 582  | wt                                   | m                                  | norm                        | neg                | neg               | pos                 | 1374                  |
| 583  | wt                                   | m                                  | del17p                      | pos                | neg               | pos                 | 12828                 |
| 584  | wt                                   | um                                 | del11q                      | neg                | pos               | pos                 | 2806                  |
| 585  | mut                                  | um                                 | del13p                      | pos                | neg               | neg                 | 1830                  |
| 586  | mut                                  | um                                 | tris12                      | pos                | pos               | pos                 | 1665                  |
| 587  | wt                                   | m                                  | tris12                      | pos                | pos               | na                  | 9848                  |
| 588  | wt                                   | m                                  | del13p                      | pos                | na                | neg                 | 17024                 |
| 589  | wt                                   | m                                  | del17p                      | pos                | pos               | pos                 | 2356                  |
| 590  | wt                                   | m                                  | del13p                      | neg                | neg               | neg                 | 2875                  |
| 591  | mut                                  | um                                 | del17p                      | pos                | pos               | pos                 | 3091                  |
| 592  | wt                                   | na                                 | del17p                      | pos                | neg               | pos                 | 7630                  |
| 593  | wt                                   | m                                  | norm                        | neg                | neg               | pos                 | 2287                  |
| 594  | wt                                   | m                                  | del13p                      | neg                | neg               | pos                 | 3160                  |
| 595  | wt                                   | m                                  | tris12                      | pos                | pos               | neg                 | 19559                 |
| 596  | wt                                   | m                                  | del17p                      | neg                | neg               | neg                 | 615                   |
| 597  | mut                                  | um                                 | tris12                      | pos                | pos               | pos                 | 1202                  |
| 598  | wt                                   | um                                 | del13p                      | neg                | neg               | neg                 | 1655                  |
| 599  | mut                                  | um                                 | del11q                      | neg                | pos               | na                  | 2407                  |
| 600  | wt                                   | um                                 | del13p                      | neg                | neg               | neg                 | 2624                  |
| 601  | wt                                   | m                                  | del13p                      | neg                | neg               | pos                 | 2644                  |
| 602  | wt                                   | na                                 | norm                        | neg                | neg               | pos                 | 1068                  |
| 603  | wt                                   | um                                 | del11q                      | neg                | neg               | neg                 | 621                   |
| 604  | wt                                   | um                                 | del11q                      | neg                | pos               | pos                 | 2127                  |
| 605  | wt                                   | m                                  | tris12                      | pos                | neg               | neg                 | 2861                  |
| 606  | wt                                   | m                                  | del13p                      | neg                | neg               | neg                 | 1159                  |
| 607  | mut                                  | um                                 | tris12                      | pos                | pos               | pos                 | 1950                  |

| ID # | <i>NOTCH1</i> status <sup>a</sup> | <i>IGHV</i> status <sup>b</sup> | FISH status <sup>c</sup> | CD49d <sup>d</sup> | CD38 <sup>d</sup> | ZAP-70 <sup>d</sup> | CD20 MFI <sup>e</sup> |
|------|-----------------------------------|---------------------------------|--------------------------|--------------------|-------------------|---------------------|-----------------------|
| 608  | wt                                | m                               | del13p                   | neg                | neg               | neg                 | 632                   |
| 609  | wt                                | na                              | norm                     | neg                | neg               | neg                 | 1784                  |
| 610  | wt                                | m                               | del17p                   | pos                | neg               | neg                 | 1874                  |
| 611  | wt                                | na                              | norm                     | pos                | pos               | neg                 | 22500                 |
| 612  | wt                                | m                               | del13p                   | neg                | neg               | na                  | 1048                  |
| 613  | wt                                | um                              | tris12                   | pos                | neg               | na                  | 904                   |
| 614  | wt                                | m                               | norm                     | pos                | neg               | na                  | 8337                  |
| 615  | wt                                | um                              | del13p                   | neg                | neg               | na                  | 1964                  |
| 616  | wt                                | m                               | del13p                   | neg                | neg               | na                  | 1435                  |
| 617  | wt                                | um                              | del13p                   | neg                | neg               | na                  | 2933                  |
| 618  | wt                                | m                               | del13p                   | neg                | neg               | neg                 | 1435                  |
| 619  | wt                                | um                              | norm                     | neg                | neg               | na                  | 10098                 |
| 620  | mut                               | um                              | del11q                   | pos                | pos               | na                  | 2396                  |
| 621  | wt                                | m                               | del13p                   | neg                | neg               | na                  | 2906                  |
| 622  | wt                                | m                               | del13p                   | neg                | neg               | na                  | 2052                  |
| 623  | wt                                | m                               | norm                     | neg                | neg               | na                  | 2686                  |
| 624  | wt                                | m                               | del13p                   | pos                | pos               | na                  | 3610                  |
| 625  | wt                                | m                               | del17p                   | neg                | neg               | na                  | 3626                  |
| 626  | wt                                | um                              | del17p                   | neg                | neg               | na                  | 1023                  |
| 627  | wt                                | m                               | del13p                   | pos                | pos               | na                  | 1994                  |
| 628  | wt                                | m                               | del11q                   | pos                | pos               | na                  | 11905                 |
| 629  | mut                               | um                              | del13p                   | neg                | pos               | na                  | 1277                  |
| 630  | wt                                | um                              | del13p                   | pos                | neg               | na                  | 1064                  |
| 631  | wt                                | m                               | del13p                   | neg                | neg               | na                  | 1798                  |
| 632  | wt                                | m                               | norm                     | neg                | neg               | na                  | 809                   |
| 633  | wt                                | um                              | del11q                   | neg                | neg               | na                  | 2844                  |
| 634  | wt                                | m                               | norm                     | neg                | neg               | na                  | 2141                  |
| 635  | wt                                | um                              | tris12                   | pos                | pos               | na                  | 41                    |
| 636  | wt                                | m                               | del13p                   | neg                | neg               | na                  | 654                   |
| 637  | wt                                | um                              | norm                     | neg                | pos               | na                  | 3043                  |
| 638  | wt                                | m                               | del13p                   | neg                | neg               | na                  | 2140                  |
| 639  | wt                                | m                               | del13p                   | neg                | neg               | na                  | 1853                  |
| 640  | mut                               | um                              | tris12                   | pos                | pos               | na                  | 2438                  |
| 641  | wt                                | m                               | del13p                   | neg                | neg               | na                  | 1566                  |
| 642  | wt                                | m                               | tris12                   | pos                | pos               | na                  | 3470                  |
| 643  | wt                                | m                               | norm                     | neg                | neg               | na                  | 1471                  |
| 644  | wt                                | um                              | del11q                   | neg                | neg               | na                  | 1820                  |
| 645  | wt                                | m                               | del13p                   | pos                | neg               | na                  | 10082                 |
| 646  | wt                                | na                              | del11q                   | pos                | neg               | na                  | 3243                  |
| 647  | wt                                | um                              | tris12                   | pos                | neg               | na                  | 1801                  |
| 648  | wt                                | um                              | del11q                   | neg                | pos               | na                  | 1840                  |
| 649  | wt                                | um                              | del13p                   | neg                | neg               | pos                 | 2508                  |
| 650  | mut                               | um                              | norm                     | pos                | pos               | na                  | 1957                  |
| 651  | mut                               | um                              | del13p                   | pos                | pos               | pos                 | 2077                  |
| 652  | mut                               | m                               | norm                     | neg                | neg               | na                  | 2960                  |
| 653  | mut                               | m                               | norm                     | neg                | neg               | na                  | 1448                  |
| 654  | wt                                | m                               | tris12                   | pos                | neg               | na                  | 9933                  |
| 655  | mut                               | um                              | tris12                   | pos                | pos               | na                  | 1801                  |
| 656  | wt                                | m                               | tris12                   | pos                | neg               | na                  | 13955                 |
| 657  | mut                               | um                              | del11q                   | pos                | neg               | na                  | 1610                  |
| 658  | wt                                | um                              | del13p                   | neg                | neg               | na                  | 2632                  |
| 659  | wt                                | m                               | del13p                   | pos                | neg               | na                  | 5602                  |
| 660  | wt                                | m                               | del13p                   | neg                | neg               | na                  | 2898                  |
| 661  | wt                                | m                               | del13p                   | neg                | neg               | na                  | 1189                  |
| 662  | mut                               | m                               | del11q                   | pos                | neg               | pos                 | 2360                  |

a: as determined by next generation sequencing (NGS). b: *IGHV* status was established according to the conventional cut-off, as reported in ref. 9. c: FISH status was determined according to ref. 13. d: CD49d, CD38 and ZAP70 expression are reported as percentage of positive cells (cutoff of CD49d and CD38 expression:  $\geq 30\%$  of positive cells; cutoff of ZAP70 expression:  $\geq 20\%$  of positive cells), as in ref. 9. e: MFI values are subtracted from the values of irrelevant isotype-matched antibody.

Abbreviations: ID #: identification number, *NOTCH1* status: wt, *NOTCH1* wild type, mut, *NOTCH1* mutated; *IGHV* status: um, *IGHV* unmutated, m, *IGHV* mutated; FISH: norm, normal karyotype; CD49d, CD38, ZAP70 expression: pos, positive, neg, negative; na, not available.

**Table S7. NOTCH1 mutation features of the NOTCH1 mutated cohort (116 cases).**

| ID# | Mutation_1                                               | Mutation_2                                            | Mutation_3 | Verification     |
|-----|----------------------------------------------------------|-------------------------------------------------------|------------|------------------|
| 2   | g.139390648CAG>C; c.7541_7542delCT; p.P2514Rfs*4; 8.1%   |                                                       |            | ARMS-PCR         |
| 7   | g.139390152T>C; c.*7668+371A>G; 49.4%                    |                                                       |            | RT-PCR           |
| 8   | g.139390648CAG>C; c.7541_7542delCT; p.P2514Rfs*4; 48.3%  |                                                       |            | ARMS-PCR         |
| 9   | g.139390648CAG>C; c.7541_7542delCT; p.P2514Rfs*4; 11.5%  |                                                       |            | ARMS-PCR         |
| 10  | g.139390648CAG>C; c.7541_7542delCT; p.P2514Rfs*4; 3.5%   |                                                       |            | ARMS-PCR         |
| 13  | g.139390765CG>C; c.7425delC; p.V2476*; 35.8%             |                                                       |            | Sanger           |
| 18  | g.139390152T>C; c.*7668+371A>G; 36.5%                    |                                                       |            | RT-PCR           |
| 30  | g.139390648CAG>C; c.7541_7542delCT; p.P2514Rfs*4; 3.2%   |                                                       |            | ARMS-PCR         |
| 34  | g.139390648CAG>C; c.7541_7542delCT; p.P2514Rfs*4; 10.5%  |                                                       |            | ARMS-PCR         |
| 38  | g.139390797G>GGC; c.7392_7393insGC; p.P2465Afs*13; 43.3% |                                                       |            | Sanger           |
| 45  | g.139390152T>C; c.*7668+371A>G; 35.6%                    |                                                       |            | RT-PCR           |
| 55  | g.139390648CAG>C; c.7541_7542delCT; p.P2514Rfs*4; 2.0%   |                                                       |            | ARMS-PCR         |
| 66  | g.139390648CAG>C; c.7541_7542delCT; p.P2514Rfs*4; 3.7%   |                                                       |            | ARMS-PCR         |
| 72  | g.139390648CAG>C; c.7541_7542delCT; p.P2514Rfs*4; 33.4%  |                                                       |            | ARMS-PCR         |
| 82  | g.139390648CAG>C; c.7541_7542delCT; p.P2514Rfs*4; 19.5%  |                                                       |            | ARMS-PCR, Sanger |
| 86  | g.139390648CAG>C; c.7541_7542delCT; p.P2514Rfs*4; 15.4%  |                                                       |            | ARMS-PCR         |
| 95  | g.139390648CAG>C; c.7541_7542delCT; p.P2514Rfs*4; 4.3%   |                                                       |            | ARMS-PCR         |
| 112 | g.139390152T>C; c.*7668+371A>G; 46.3%                    |                                                       |            | NGS              |
| 121 | g.139390648CAG>C; c.7541_7542delCT; p.P2514Rfs*4; 8.1%   |                                                       |            | ARMS-PCR         |
| 126 | g.139390648CAG>C; c.7541_7542delCT; p.P2514Rfs*4; 1.5%   |                                                       |            | ARMS-PCR         |
| 135 | g.139390648CAG>C; c.7541_7542delCT; p.P2514Rfs*4; 83.0%  |                                                       |            | ARMS-PCR         |
| 140 | g.139390648CAG>C; c.7541_7542delCT; p.P2514Rfs*4; 54.5%  |                                                       |            | ARMS-PCR         |
| 152 | g.139390152T>C; c.*7668+371A>G; 44.0%                    |                                                       |            | RT-PCR           |
| 153 | g.139390648CAG>C; c.7541_7542delCT; p.P2514Rfs*4; 39.0%  |                                                       |            | ARMS-PCR         |
| 158 | g.139390152T>C; c.*7668+371A>G; 22.5%                    | g.139390897AC>A; c.7293delG; p.R2431fs*4; 12.9%       |            | NGS, Sanger      |
| 167 | g.139390648CAG>C; c.7541_7542delCT; p.P2514Rfs*4; 34.9%  |                                                       |            | ARMS-PCR, Sanger |
| 175 | g.139390648CAG>C; c.7541_7542delCT; p.P2514Rfs*4; 4.6%   |                                                       |            | ARMS-PCR         |
| 178 | g.139390152T>C; c.*7668+371A>G; 33.9%                    |                                                       |            | RT-PCR           |
| 182 | g.139390648CAG>C; c.7541_7542delCT; p.P2514Rfs*4; 4.6%   |                                                       |            | ARMS-PCR         |
| 186 | g.139390648CAG>C; c.7541_7542delCT; p.P2514Rfs*4; 41.6%  |                                                       |            | ARMS-PCR         |
| 192 | g.139390648CAG>C; c.7541_7542delCT; p.P2514Rfs*4; 2.5%   |                                                       |            | ARMS-PCR         |
| 205 | g.139390648CAG>C; c.7541_7542delCT; p.P2514Rfs*4; 19.1%  |                                                       |            | ARMS-PCR         |
| 207 | g.139390648CAG>C; c.7541_7542delCT; p.P2514Rfs*4; 3.5%   |                                                       |            | ARMS-PCR, Sanger |
| 212 | g.139390648CAG>C; c.7541_7542delCT; p.P2514Rfs*4; 43.0%  |                                                       |            | ARMS-PCR         |
| 213 | g.139390929AC>A; c.7261delG; p.V2421*; 32.7%             |                                                       |            | Sanger           |
| 214 | g.139390648CAG>C; c.7541_7542delCT; p.P2514Rfs*4; 46.9%  |                                                       |            | ARMS-PCR         |
| 216 | g.139390648CAG>C; c.7541_7542delCT; p.P2514Rfs*4; 3.2%   |                                                       |            | ARMS-PCR         |
| 222 | g.139391369GGA>G; c.6820_6821delTC; p.S2274Pfs*79; 50.0% |                                                       |            | Sanger           |
| 230 | g.139390648CAG>C; c.7541_7542delCT; p.P2514Rfs*4; 18.9%  |                                                       |            | ARMS-PCR         |
| 232 | g.139390648CAG>C; c.7541_7542delCT; p.P2514Rfs*4; 38.6%  |                                                       |            | ARMS-PCR         |
| 234 | g.139390145T>C; c.*7668+378A>G; 5.8%                     | g.139390648CAG>C; c.7541_7542delCT; p.P2514Rfs*; 3.2% |            | RT-PCR, ARMS-PCR |
| 253 | g.139390648CAG>C; c.7541_7542delCT; p.P2514Rfs*4; 18.7%  |                                                       |            | ARMS-PCR         |
| 259 | g.139390648CAG>C; c.7541_7542delCT; p.P2514Rfs*4; 47.3%  |                                                       |            | ARMS-PCR         |
| 270 | g.139390648CAG>C; c.7541_7542delCT; p.P2514Rfs*4; 41.4%  |                                                       |            | ARMS-PCR, Sanger |
| 276 | g.139390648CAG>C; c.7541_7542delCT; p.P2514Rfs*4; 1.2%   |                                                       |            | NGS*             |
| 286 | g.139390648CAG>C; c.7541_7542delCT; p.P2514Rfs*4; 31.1%  |                                                       |            | ARMS-PCR, Sanger |
| 287 | g.139390648CAG>C; c.7541_7542delCT; p.P2514Rfs*4; 5.2%   |                                                       |            | ARMS-PCR         |
| 289 | g.139390648CAG>C; c.7541_7542delCT; p.P2514Rfs*4; 39.6%  |                                                       |            | ARMS-PCR         |
| 290 | g.139390648CAG>C; c.7541_7542delCT; p.P2514Rfs*4; 6.4%   | g.139390791GA>G c.7399delT p.S2467Rfs*10 5.7%         |            | ARMS-PCR, NGS    |
| 291 | g.139390648CAG>C; c.7541_7542delCT; p.P2514Rfs*4; 40.2%  |                                                       |            | ARMS-PCR         |
| 293 | g.139390648CAG>C; c.7541_7542delCT; p.P2514Rfs*4; 1.1%   |                                                       |            | NGS*             |
| 305 | g.139390648CAG>C; c.7541_7542delCT; p.P2514Rfs*4; 2.9%   |                                                       |            | ARMS-PCR         |
| 308 | g.139390684G>A; c.7507C>T; p.Q2503*; 2.1%                |                                                       |            | NGS              |
| 310 | g.139390648CAG>C; c.7541_7542delCT; p.P2514Rfs*4; 36.6%  |                                                       |            | ARMS-PCR         |
| 313 | g.139390648CAG>C; c.7541_7542delCT; p.P2514Rfs*4; 1.3%   |                                                       |            | ARMS-PCR         |
| 322 | g.139390648CAG>C; c.7541_7542delCT; p.P2514Rfs*4; 3.0%   |                                                       |            | ARMS-PCR         |

| ID# | Mutation_1                                                                                          | Mutation_2                                                                             | Mutation_3                                | Verification     |
|-----|-----------------------------------------------------------------------------------------------------|----------------------------------------------------------------------------------------|-------------------------------------------|------------------|
| 323 | g.139390145T>C; c.*7668+378A>G; 4.1%                                                                |                                                                                        |                                           | RT-PCR           |
| 331 | g.139390648CAG>C; c.7541_7542delCT; p.P2514Rfs*4; 23.3%                                             |                                                                                        |                                           | ARMS-PCR         |
| 340 | g.139390648CAG>C; c.7541_7542delCT; p.P2514Rfs*4; 1.0%                                              |                                                                                        |                                           | NGS*             |
| 342 | g.139390648CAG>C; c.7541_7542delCT; p.P2514Rfs*4; 1.1%                                              |                                                                                        |                                           | NGS*             |
| 346 | g.139390861G>A; c.7330C>T; p.Q2444*; 12.5%                                                          |                                                                                        |                                           | Sanger           |
| 365 | g.139390648CAG>C; c.7541_7542delCT; p.P2514Rfs*4; 35.8%                                             |                                                                                        |                                           | ARMS-PCR         |
| 369 | g.139390648CAG>C; c.7541_7542delCT; p.P2514Rfs*4; 1.3%                                              | g.139391645CTTCTTCCTCCGTGCCT>C;<br>c.6530_6545delAGGCACGGAGGAAGAA; p.K2177Sfs*66; 5.5% |                                           | ARMS-PCR, NGS    |
| 390 | g.139390648CAG>C; c.7541_7542delCT; p.P2514Rfs*4; 2.9%                                              |                                                                                        |                                           | ARMS-PCR         |
| 400 | g.139390648CAG>C; c.7541_7542delCT; p.P2514Rfs*4; 26.2%                                             |                                                                                        |                                           | ARMS-PCR, Sanger |
| 401 | g.139390648CAG>C; c.7541_7542delCT; p.P2514Rfs*4; 77.0%                                             |                                                                                        |                                           | ARMS-PCR         |
| 402 | g.139390648CAG>C; c.7541_7542delCT; p.P2514Rfs*4; 33.0%                                             |                                                                                        |                                           | ARMS-PCR         |
| 423 | g.139390648CAG>C; c.7541_7542delCT; p.P2514Rfs*4; 31.3%                                             |                                                                                        |                                           | ARMS-PCR         |
| 424 | g.139390152T>C; c.*7668+371A>G; 14.1%                                                               |                                                                                        |                                           | RT-PCR           |
| 427 | g.139390648CAG>C; c.7541_7542delCT; p.P2514Rfs*4; 45.7%                                             |                                                                                        |                                           | ARMS-PCR, Sanger |
| 430 | g.139390648CAG>C; c.7541_7542delCT; p.P2514Rfs*4; 37.9%                                             |                                                                                        |                                           | ARMS-PCR, Sanger |
| 455 | g.139390648CAG>C; c.7541_7542delCT; p.P2514Rfs*4; 2.2%                                              |                                                                                        |                                           | ARMS-PCR         |
| 456 | g.139390152T>C; c.*7668+371A>G; 49.9%                                                               |                                                                                        |                                           | NGS              |
| 457 | g.139390152T>C; c.*7668+371A>G; 20.4%                                                               |                                                                                        |                                           | RT-PCR           |
| 459 | g.139390152T>C; c.*7668+371A>G; 49.3%                                                               |                                                                                        |                                           | RT-PCR           |
| 461 | g.139390648CAG>C; c.7541_7542delCT; p.P2514Rfs*4; 41.3%                                             |                                                                                        |                                           | ARMS-PCR, Sanger |
| 462 | g.139390152T>C; c.*7668+371A>G; 20.5%                                                               |                                                                                        |                                           | RT-PCR           |
| 466 | g.139390648CAG>C; c.7541_7542delCT; p.P2514Rfs*4; 24.2%                                             | g.139390861G>A; c.7330C>T; p.Q2444*; 25.8%                                             |                                           | ARMS-PCR, Sanger |
| 468 | g.139390648CAG>C; c.7541_7542delCT; p.P2514Rfs*4; 3.5%                                              |                                                                                        |                                           | ARMS-PCR         |
| 470 | g.139390648CAG>C; c.7541_7542delCT; p.P2514Rfs*4; 42.0%                                             |                                                                                        |                                           | ARMS-PCR         |
| 477 | g.139390648CAG>C; c.7541_7542delCT; p.P2514Rfs*4; 1.8%                                              |                                                                                        |                                           | ARMS-PCR         |
| 483 | g.139390648CAG>C; c.7541_7542delCT; p.P2514Rfs*4; 5.2%                                              |                                                                                        |                                           | ARMS-PCR         |
| 497 | g.139390152T>C; c.*7668+371A>G; 49.9%                                                               |                                                                                        |                                           | RT-PCR           |
| 499 | g.139390145T>C; c.*7668+378A>G; 44.8%                                                               |                                                                                        |                                           | RT-PCR           |
| 506 | g.139390648CAG>C; c.7541_7542delCT; p.P2514Rfs*4; 16.7%                                             |                                                                                        |                                           | ARMS-PCR         |
| 511 | g.139390648CAG>C; c.7541_7542delCT; p.P2514Rfs*4; 1.8%                                              |                                                                                        |                                           | ARMS-PCR         |
| 513 | g.139390648CAG>C; c.7541_7542delCT; p.P2514Rfs*4; 1.6%                                              |                                                                                        |                                           | ARMS-PCR         |
| 527 | g.139390152T>C; c.*7668+371A>G; 6.7%                                                                |                                                                                        |                                           | RT-PCR           |
| 535 | g.139390861G>A; c.7330C>T; p.Q2444*; 18.3%                                                          |                                                                                        |                                           | Sanger           |
| 538 | g.139390648CAG>C; c.7541_7542delCT; p.P2514Rfs*4; 36.6%                                             |                                                                                        |                                           | ARMS-PCR         |
| 545 | g.139390648CAG>C; c.7541_7542delCT; p.P2514Rfs*4; 12.9%                                             |                                                                                        |                                           | ARMS-PCR         |
| 547 | g.139390648CAG>C; c.7541_7542delCT; p.P2514Rfs*4; 13.8%                                             |                                                                                        |                                           | ARMS-PCR         |
| 552 | g.139390648CAG>C; c.7541_7542delCT; p.P2514Rfs*4; 5.6%                                              |                                                                                        |                                           | ARMS-PCR, Sanger |
| 555 | g.139390152T>C; c.*7668+371A>G; 12.1%                                                               |                                                                                        |                                           | RT-PCR           |
| 559 | g.139390734G>T; c.7457C>A; p.S2486*; 1.6%                                                           |                                                                                        |                                           | NGS              |
| 571 | g.139390873G>A; c.7318C>T; p.Q2440*; 39.2%                                                          |                                                                                        |                                           | Sanger           |
| 574 | g.139390648CAG>C; c.7541_7542delCT; p.P2514Rfs*4; 2.4%                                              | g.139390648_2C>A; c.7543G>T; p.E2515*; 35.9%                                           |                                           | ARMS-PCR, Sanger |
| 576 | g.139390648CAG>C; c.7541_7542delCT; p.P2514Rfs*4; 1.5%                                              |                                                                                        |                                           | ARMS-PCR         |
| 577 | g.139390648CAG>C; c.7541_7542delCT; p.P2514Rfs*4; 33.4%                                             |                                                                                        |                                           | ARMS-PCR         |
| 579 | g.139390861G>A; c.7330C>T; p.Q2444*; 30.1%                                                          |                                                                                        |                                           | Sanger           |
| 585 | g.139390145T>C; c.*7668+378A>G; 40.1%                                                               |                                                                                        |                                           | RT-PCR           |
| 586 | g.139390648CAG>C; c.7541_7542delCT; p.P2514Rfs*4; 1.4%                                              | g.139390846TG>T; c.7344delC; p.S2449Afs*28; 19.1%                                      |                                           | ARMS-PCR, Sanger |
| 591 | g.139390145T>C; c.*7668+378A>G; 27.7%                                                               | g.139390675C>A; c.7516G>T; p.E2506*; 12.6%                                             |                                           | RT-PCR, Sanger   |
| 597 | g.139390873G>A; c.7318C>T; p.Q2440*; 7.5%                                                           |                                                                                        |                                           | NGS              |
| 599 | g.139390648CAG>C; c.7541_7542delCT; p.P2514Rfs*4; 46.3%                                             |                                                                                        |                                           | ARMS-PCR, Sanger |
| 607 | g.139390152T>C; c.*7668+371A>G; 18.0%                                                               | g.139390648CAG>C; c.7541_7542delCT; p.P2514Rfs*4; 2.9%                                 |                                           | RT-PCR, NGS      |
| 620 | g.139390145T>C; c.*7668+378A>G; 13.0%                                                               |                                                                                        |                                           | RT-PCR           |
| 629 | g.139390648CAG>C; c.7541_7542delCT; p.P2514Rfs*4; 1.7%                                              |                                                                                        |                                           | ARMS-PCR         |
| 640 | g.139390152T>C; c.*7668+371A>G; 45.2%                                                               |                                                                                        |                                           | RT-PCR           |
| 650 | g.139390145T>C; c.*7668+378A>G; 19.6%                                                               | g.139390684G>A; c.7507C>T; p.Q2503*; 5.5%                                              | g.139390690G>A; c.7501C>T; p.Q2501*; 5.1% | RT-PCR, NGS      |
| 651 | g.139390152T>C; c.*7668+371A>G; 47.4%                                                               |                                                                                        |                                           | RT-PCR           |
| 652 | g.139390659GTGAGGAAGGGGTGCTCAGGCACC>G;<br>c.7509_7532delGGTGCCTGAGCACCCCTTCTCA; p.T2511Rfs*24; 2.6% |                                                                                        |                                           | NGS              |

| <b>ID#</b> | <b>Mutation_1</b>                                      | <b>Mutation_2</b> | <b>Mutation_3</b> | <b>Verification</b> |
|------------|--------------------------------------------------------|-------------------|-------------------|---------------------|
| 653        | g.139390152T>C; c.*7668+371A>G; 31.4%                  |                   |                   | NGS                 |
| 655        | g.139390716G>T; c.7475C>A; p.S2492*; 3.6%              |                   |                   | NGS                 |
| 657        | g.139390648CAG>C; c.7541_7542delCT; p.P2514Rfs*4; 3.4% |                   |                   | ARMS-PCR            |
| 662        | g.139390721G>C; c.7470C>G; p.Y2490*; 2.9%              |                   |                   | NGS                 |

ID#: identification number.

Mutation description: genomic ("g" relative to human genome assembly hg19), mRNA ("c"), aminoacidic ("p") substitutions and variant allele frequency (VAF, "%") are reported.

ARMS-PCR, mutation verified by Amplification Refractory Mutation System; NGS, mutation verified by an independent round of NGS (amplification and sequencing); Sanger, mutation verified by Sanger sequencing; RT-PCR, mutation verified by specific PCR for aberrant splicing on cDNA.

NGS\*: preliminarily detected by ARMS-PCR; VAF computed by analysis of raw NGS data.

## Supplemental figure legends

**Figure S1. Validation of NGS strategy to detect *NOTCH1* mutations.** (A) Dilution experiments to determine the sensitivity of NGS approach to call low frequency mutations. Serial dilutions were made by mixing with normal DNA from a healthy donor either the DNA of one of 3 CLL cases carrying *NOTCH1* mutations (i.e. 1 case with g.139390152T>C, 1 case with g.139390648CAG>C, and 1 case with g.139390873G>A) or the DNA of a CLL case carrying a SNP in the *NOTCH1* gene (i.e. g.139391636G>A, rs2229974). As reported in supplemental materials and methods, only somatic mutations truncating the NOTCH1 protein were included in the analysis. (B) Threshold of Sanger sequencing detection. Shown are screenshots of Integrative Genomics Viewer (IGV), and Sanger sequencing electropherograms (inset), of 3 representative *NOTCH1* mutations detected by NGS, and investigated by Sanger sequencing. *NOTCH1* mutations with a VAF<12% were confirmed by a second independent NGS experiment (see Table S7). ID, mutation VAF and coverage (depth), corresponding to each *NOTCH1*-mut cases is reported. (C) Representative gel image of ARMS-PCR verification for c.7541-7542delCT mutation (g.139390648CAG>C). Representative results of the ARMS PCR assay showing 3 CLL samples that scored positive and 1 sample that scored negative for c.7541-7542delCT mutation. Negative sample shows a normal band of 284 base pair (bp, single arrow). Positive samples show an additional band of 183 bp (double arrow). Molecular weight is the 100 bp ladder. Camera: Gel Doc EZ, BioRad; image acquisition software: Image Lab 3.0, BioRad. ID and mutation VAF corresponding to each *NOTCH1*-mut cases is reported. (D) RT-PCR to detect the presence of the aberrant spliced transcript in 3' UTR *NOTCH1*-mut cases. RT-PCR amplification showing the expected 719-base pair (bp) band in a *NOTCH1*-wt case, and an additional smaller band in cases carrying 3' UTR *NOTCH1* mutations. This amplification was performed in 23/26 3' UTR *NOTCH1*-mut cases. In 3/26 3' UTR *NOTCH1*-mut cases, in which RNA sample was not available, a second independent NGS experiment was performed to confirm the presence of the 3' UTR *NOTCH1* mutations (see Table S7). Molecular weight is the 100 bp ladder. Camera: Gel Doc EZ, BioRad; image acquisition software: Image Lab 3.0, BioRad. ID and mutation VAF corresponding to each *NOTCH1*-mut cases is reported. (E) Frequencies of clonal (i.e. with VAF≥12%, subdivided in <35% or ≥35%) and subclonal (i.e. with VAF<12%) mutations, among the group of 26 3' UTR *NOTCH1* mutations or the group of 101 coding *NOTCH1* mutations. Data were analyzed using chi-square test.

**Figure S2. Western blot of NOTCH1 and CD20 protein expression according to *NOTCH1* mutational status.** (A) Western blot showing total NOTCH1 protein expression (transmembrane NOTCH1 and NICD) in representative CLL cases, i.e. in 4 *NOTCH1*-wt cases, 3 coding *NOTCH1*-mut cases (2 cases with the g.139390648CAG>C, c.7541-7542delCT, p.P2514Rfs\*4; 1 case with the g.139390929AC>A, c.7261delG, p.V2421\*), and 7 3' UTR *NOTCH1*-mut cases (5 cases with the g.139390152T>C, c.\*7668+371A>G; 2 cases with the g.139390145T>C, c.\*7668+378A>G).  $\beta$ -actin was used as loading control. (B) Western blot showing CD20 (L26 epitope) protein expression by using high antibody concentrations (anti-CD20, dilution 1/500, and anti-mouse secondary antibody, dilution 1/1000, see Table S5) at three different exposure times (i.e. 15 seconds, 4 minutes and 20 minutes). CD20 expression was investigated in 3 *NOTCH1*-wt cases, 3 coding *NOTCH1*-mut cases (2 cases with the g.139390648CAG>C, c.7541-7542delCT, p.P2514Rfs\*4; 1 case with the g.139390929AC>A, c.7261delG, p.V2421\*), and 7 3' UTR *NOTCH1*-mut cases (5 cases with the g.139390152T>C, c.\*7668+371A>G; 2 cases with the g.139390145T>C, c.\*7668+378A>G).

**Figure S3. CD20 expression by flow cytometry in CLL cases.** (A) Bar graphs showing CD20 protein expression levels, in CLL cases according to cytogenetic abnormalities as evaluated by flow cytometry. Bar graphs represent mean values, error bars represent 95% CI. Norm, normal



karyotype; del13q, 13q deletion; tris12, trisomy 12; del11q, 11q deletion; del17p, 17p deletion.  
**(B)** Dot plots showing CD20 expression, as evaluated by flow cytometry using a FITC-conjugated anti-CD20 antibody, in prototypic 3' UTR *NOTCH1*-mut cases, coding *NOTCH1*-mut cases and *NOTCH1*-wt cases of trisomy 12 and non-trisomy 12 CLL categories.

**A**

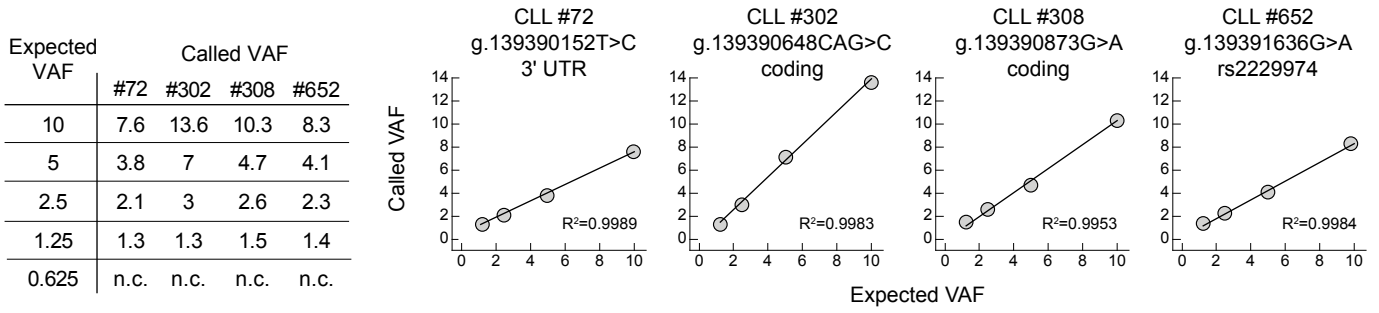

**B**

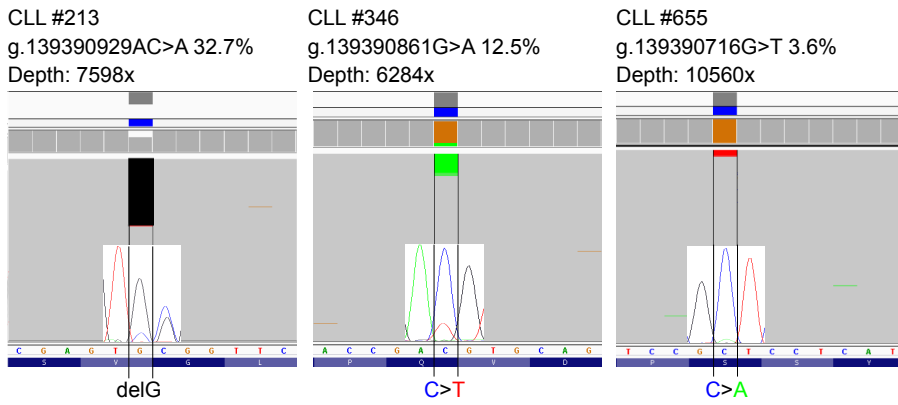

**C**

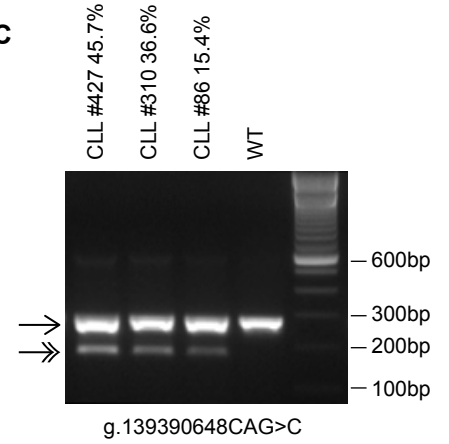

**D**

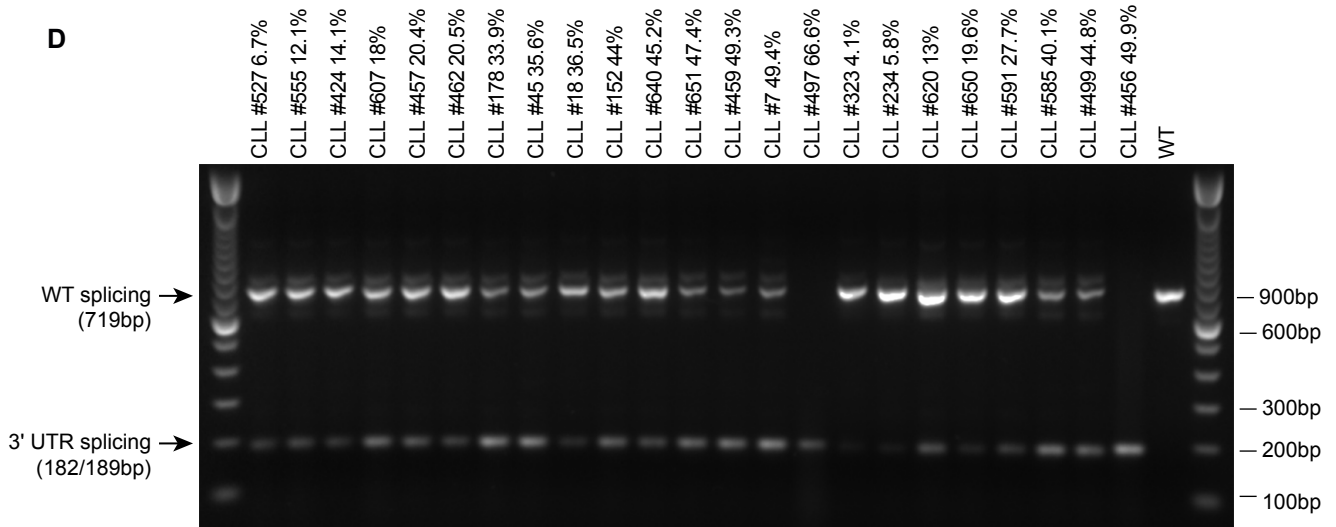

**E**

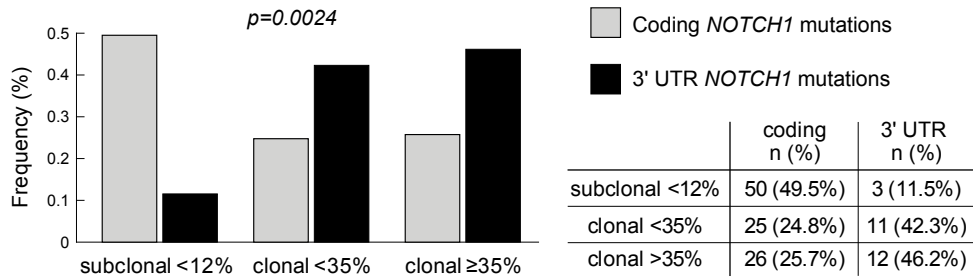

Figure S1

**A**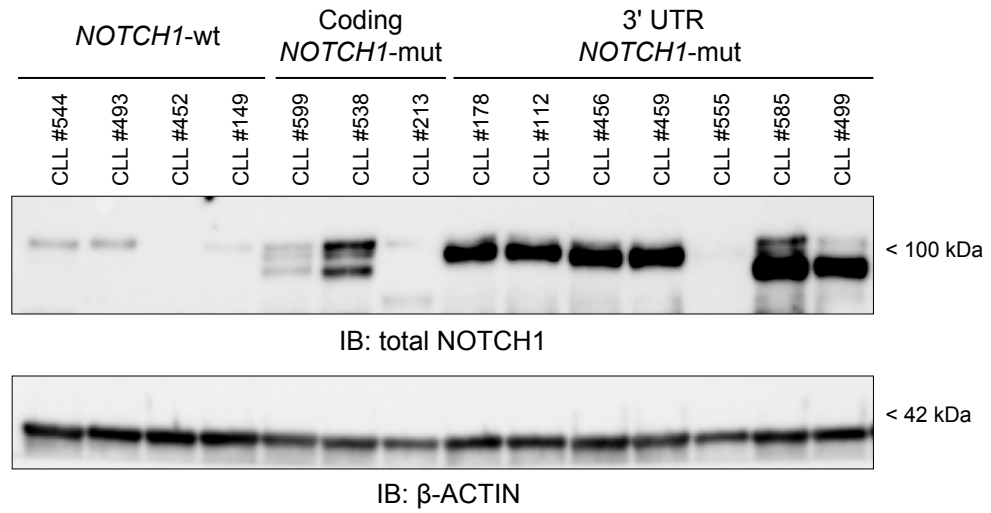**B**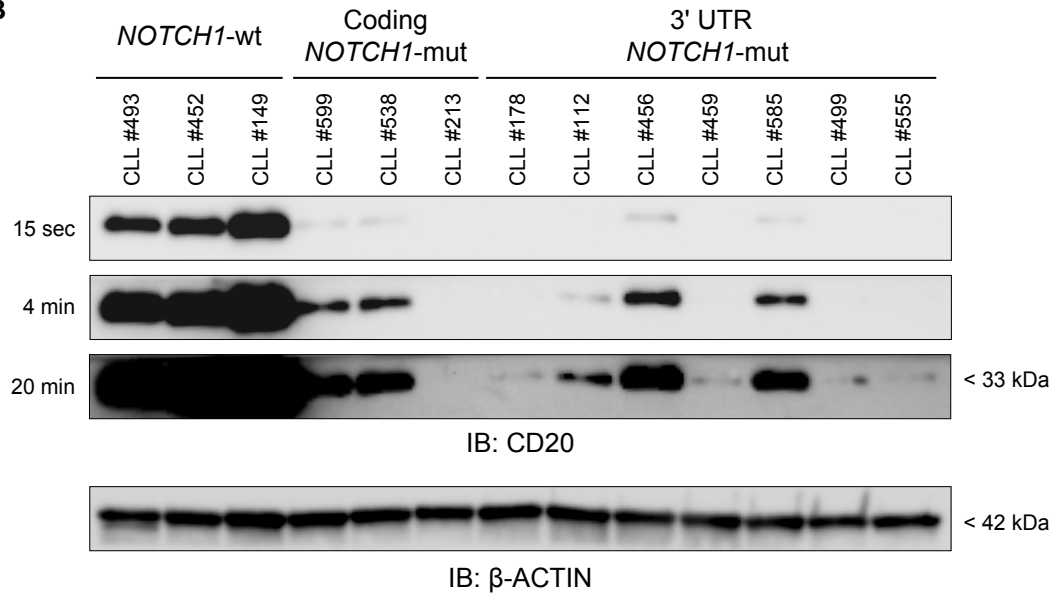**Figure S2**

**A**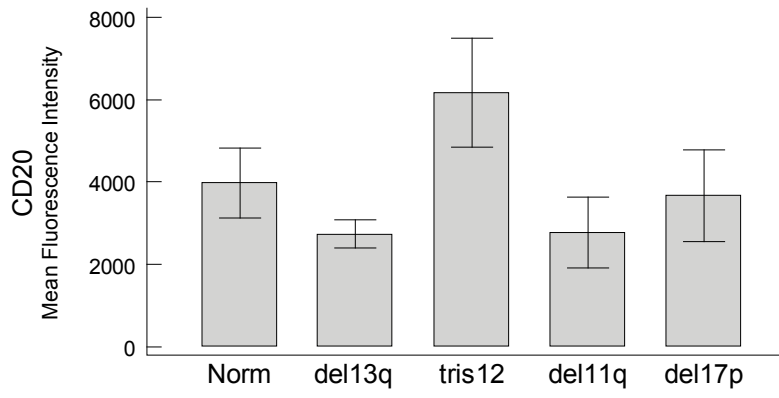**B**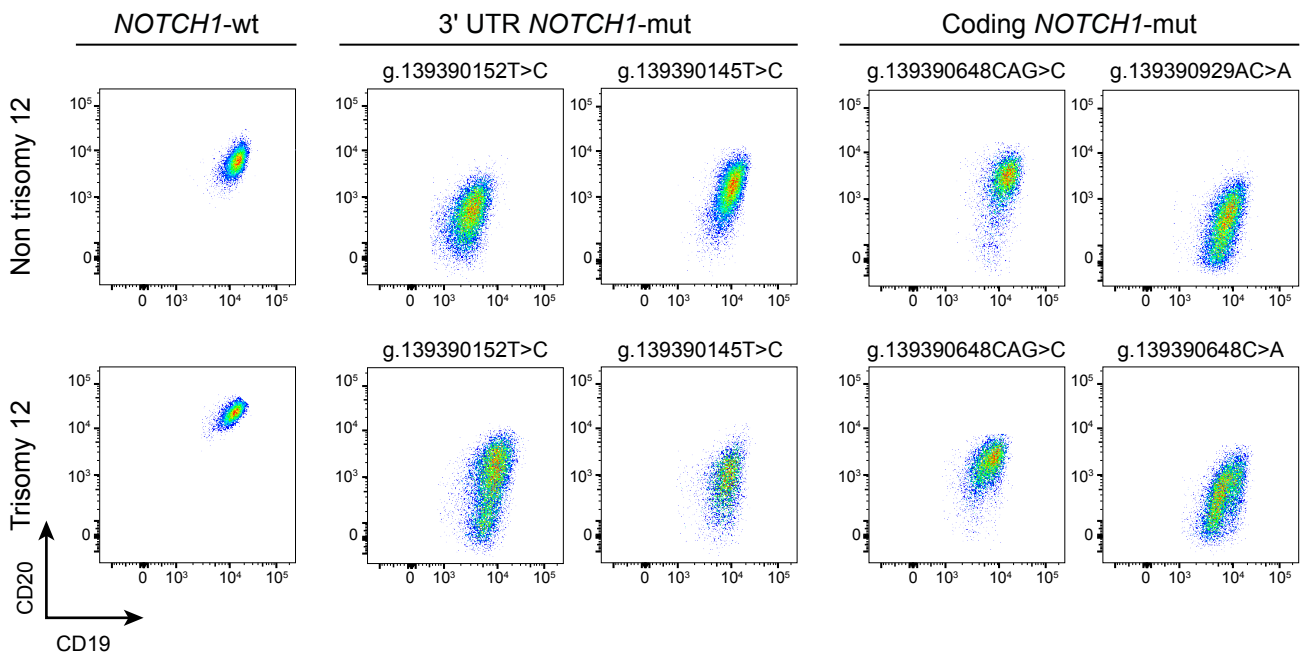**Figure S3**
