# Supplementary material
Source: PubMed Central journal article supplement (PMC6643732)
Supplement: 2016_162594-Disclosures_and_Contributions.pdf [file 2016_162594-Disclosures_and_Contributions.pdf]

Haematologica  
HAEMATOL/2016/162594  
Version 3

Mutations in the 3' untranslated region (3' UTR) of NOTCH1 are associated with low CD20 expression levels in chronic lymphocytic leukemia

Tamara Bittolo, Federico Pozzo, Riccardo Bomben, Tiziana D'Agaro, Vanessa Bravin, Pietro Bulian, Francesca Maria Rossi, Antonella Zucchetto, Massimo Degan, Paolo Macor, Giovanni D'Arena, Annalisa Chiarenza, Francesco Zaja, Gabriele Pozzato, Francesco Di Raimondo, Davide Rossi, Gianluca Gaidano, Giovanni Del Poeta, Valter Gattei, and Michele Dal Bo

Disclosures: Supported in part by the Associazione Italiana Ricerca Cancro (AIRC), Investigator Grants IG-17622 (VG), and Special Program Molecular Clinical Oncology 5 x 1000 No. 10007 (GG); Progetto Ricerca Finalizzata I.R.C.C.S. no. RF-2010-2307262 (VG), RF-2011-02349712 (GG), Progetto Giovani Ricercatori no. GR-2011-02347441 (RB), no. GR-2011-02346826 (AZ), no. GR-2011-02351370 (MDB), Ministero della Salute, Rome, Italy; Associazione Italiana contro le Leucemie, linfomi e mielomi (AIL), Venezia Section, Pramaggiore Group, Italy (VG); Fondazione per la Vita di Pordenone, Italy (MDB); 5x1000 Intramural Program, Centro di Riferimento Oncologico, Aviano, Italy (VG).

Contributions: TB and FP contributed to writing the manuscript, analyzed the data and performed the research, RB, TDA, VB, PB, FMR, AZ, MD, PM contributed to perform the research, GDA, AC, FZ, GP, FDR, DR, GG, GDP provided well characterized biological samples and contributed to writing the manuscript, VG and MDB designed the study, interpreted data, and wrote the manuscript.
